# Supplementary material for: Blueberry polyphenols alter gut microbiota & phenolic metabolism in rats
Source: Royal Society of Chemistry journal article supplement (doi:10.1039/d0fo03457f), 2021-01-01

## SUPPORTING INFORMATION – FIGURES AND TABLES

Table SI-1 – Mass spectrometry parameters for compounds quantified via MS<sup>2</sup>.

Table SI-2 – Differentially abundant taxa among all treatment groups at d90.

Figure SI-1 – Urinary excretion of hippuric acids.\*

Figure SI-2 – Urinary excretion of phenolic acids and their phase II metabolites.\*

Figure SI-3 – Urinary excretion of flavonoids and their phase II metabolites.\*

Figure SI-4 – CCA of rat microbiomes and urinary phenolic metabolites at day 90. Each dot represents the microbiome of one rat, while each line represents a pool of phenolic metabolites. The lines point in the direction they correlate with and are scaled to the size of the association.

\* All graphs in figures SI 1-3 depict urinary excretion (in nmol) from 24h urine collections throughout the study. For clarity, statistical comparisons are shown in tables below each figure. Lower case letters indicate differences between doses and the same time point (i.e., down a column), while upper case letters indicate differences between time points and within dose (i.e., across a row). Two-way ANOVA with Tukey's HSD ( $p < 0.05$ ) used for all comparisons. nd = not detected; trace = metabolite detected but below LOQ; BB = lyophilized whole blueberry dose; NG = non-gavaged group. Data shown as mean  $\pm$  SEM in graphs; mean  $\pm$  SD in tables.

Table SI-1 – Mass spectrometry parameters for compounds quantified via MS<sup>2</sup>.

| Compound             | MRM mode | RT (min) | MW    | Precursor ion (m/z) | MS <sup>2</sup> fragments (m/z) <sup>a</sup> | CV  | CE (eV) | Quantitation Standard |
|----------------------|----------|----------|-------|---------------------|----------------------------------------------|-----|---------|-----------------------|
| Anthocyanins         |          |          |       |                     |                                              |     |         |                       |
| Cyanidin             |          |          |       |                     |                                              |     |         |                       |
| Arabinoside          | +        | 1.77     | 419.1 | 419                 | 287                                          | 46  | 20      |                       |
| Galactoside          | +        | 1.62     | 449.1 | 449                 | 137, 287                                     | 46  | 54, 20  | Cyanidin-3-glucoside  |
| Glucoside            | +        | 1.86     | 449.1 | 449                 | 137, 287                                     | 46  | 54, 20  |                       |
| Delphinidin          |          |          |       |                     |                                              |     |         |                       |
| Arabinoside          | +        | 1.41     | 435.4 | 435                 | 303                                          | 100 | 18      |                       |
| Galactoside          | +        | 1.26     | 465.4 | 465                 | 69, 303                                      | 100 | 74, 18  | Cyanidin-3-glucoside  |
| Glucoside            | +        | 1.41     | 465.4 | 465                 | 69, 303                                      | 100 | 74, 18  |                       |
| Glucuronide          | +        | 3.35     | 479.4 | 479                 | 303                                          | 100 | 18      |                       |
| Malvidin             |          |          |       |                     |                                              |     |         |                       |
| Arabinoside          | +        | 2.79     | 463.4 | 463                 | 331                                          | 100 | 34      |                       |
| Galactoside          | +        | 2.74     | 493.4 | 493                 | 315, 331                                     | 100 | 50, 34  | Malvidin-3-glucoside  |
| Glucoside            | +        | 2.95     | 493.4 | 493                 | 315, 331                                     | 100 | 50, 34  |                       |
| Peonidin             |          |          |       |                     |                                              |     |         |                       |
| Arabinoside          | +        | 2.44     | 433.4 | 433                 | 301                                          | 35  | 20      |                       |
| Galactoside          | +        | 2.42     | 463.4 | 464                 | 301                                          | 35  | 20      |                       |
| Glucoside            | +        | 2.66     | 463.4 | 464                 | 301                                          | 35  | 20      | Peonidin-3-glucoside  |
| Sulfate              | +        | 4.28     | 381.4 | 381                 | 301                                          | 35  | 20      |                       |
| Petunidin            |          |          |       |                     |                                              |     |         |                       |
| Arabinoside          | +        | 2.13     | 449.4 | 449                 | 317                                          | 40  | 22      |                       |
| Galactoside          | +        | 2.05     | 479.4 | 479                 | 317                                          | 40  | 22      |                       |
| Glucoside            | +        | 2.29     | 479.4 | 479                 | 317                                          | 40  | 22      | Petunidin-3-glucoside |
| Glucuronide          | +        | 4.02     | 493.4 | 493                 | 317                                          | 40  | 22      |                       |
| Sulfate              | +        | 4.30     | 397.4 | 397                 | 317                                          | 40  | 22      |                       |
| Phenolic Acids       |          |          |       |                     |                                              |     |         |                       |
| Benzaldehydes (BALD) |          |          |       |                     |                                              |     |         |                       |
| Isovanillin          | -        | 2.50     | 150.2 | 151                 | 92, 136                                      | 24  | 22, 12  | Isovanillin           |

|                                        |   |            |       |     |          |    |        |                         |
|----------------------------------------|---|------------|-------|-----|----------|----|--------|-------------------------|
| Benzoic acids (BzA)                    |   |            |       |     |          |    |        |                         |
| Protocatechuic acid                    | - | 0.86       | 154.1 | 153 | 81, 91   | 28 | 18, 24 | Protocatechuic acid     |
| Gallic acid                            | - | 0.69       | 170.1 | 169 | 79, 97   | 32 | 22, 20 | Gallic acid             |
| Vanillic acid                          | - | 1.82       | 168.1 | 167 | 108, 152 | 28 | 20, 12 | Vanillic acid           |
| Syringic acid                          | - | 2.08       | 198.2 | 197 | 123, 182 | 36 | 24, 14 | Syringic acid           |
| BzA glucuronide                        | - | 3.93       | 298.2 | 297 | 121      | 30 | 22     | 4-OH-BALD               |
| Phenyl Acetic Acids (PAA)              |   |            |       |     |          |    |        |                         |
| 3-OH-PAA                               | - | 3.95       | 152.2 | 151 | 136, 92  | 34 | 12, 18 | 4-OH-PAA                |
| 4-OH-PAA                               | - | 1.74       | 152.2 | 151 | 107, 133 | 28 | 10     | 4-OH-PAA                |
| 3-OMe-PAA                              | - | 3.86       | 166.2 | 165 | 106, 121 | 28 | 24, 6  | 3-OMe-PAA               |
| Homovanillic acid                      | - | 2.12       | 182.2 | 181 | 122      | 18 | 14     | Homovanillic acid       |
| Phenyl Propionic Acids (PPA)           |   |            |       |     |          |    |        |                         |
| 3-OH-PPA                               | - | 3.02       | 166.2 | 165 | 121, 147 | 24 | 16, 12 | 3-OH-PPA                |
| 3-OH-4-OMe-PPA                         | - | 3.05       | 196.2 | 195 | 135, 136 | 32 | 26, 12 | 3-OH-4-OMe-PPA          |
| Dihydrocaffeic acid sulfate            | - | 1.70       | 264.2 | 261 | 137, 181 | 28 | 20, 15 | Caffeic acid            |
| <i>trans</i> -Cinnamic Acids           |   |            |       |     |          |    |        |                         |
| <i>p</i> -Coumaric acid                | - | 2.41       | 164   | 163 | 93, 120  | 28 | 28, 32 | <i>p</i> -Coumaric acid |
| Caffeic acid                           | - | 1.81       | 180.2 | 179 | 107, 117 | 32 | 22, 24 | Caffeic acid            |
| Caffeic acid sulfate <sup>b</sup>      | - | 1.68       | 260.2 | 259 | 135, 179 | 28 | 20, 15 | Caffeic acid            |
| Caffeic acid glucuronide               | - | 3.83       | 356.2 | 355 | 179      | 30 | 18     | Caffeic acid            |
| Ferulic acid                           | - | 3.20       | 194.2 | 193 | 134, 178 | 30 | 18, 12 | Ferulic acid            |
| Ferulic acid glucuronide <sup>c</sup>  | - | 3.65, 4.18 | 370.2 | 369 | 193      | 30 | 22     | Ferulic acid            |
| Isoferulic acid                        | - | 3.92       | 194.2 | 193 | 134, 178 | 30 | 18, 12 | Ferulic acid            |
| Isoferulic acid glucuronide            | - | 1.40       | 370.2 | 369 | 178, 193 | 30 | 18, 12 | Ferulic acid            |
| (Iso)Ferulic acid sulfate <sup>d</sup> | - | 1.75, 2.00 | 274.2 | 273 | 178, 193 | 30 | 18, 12 | Ferulic acid            |
| Chlorogenic acid                       | - | 1.70       | 354.3 | 353 | 85, 191  | 26 | 40, 18 | Chlorogenic acid        |
| Feruloylquinic acid                    | - | 2.64       | 368.3 | 367 | 134, 191 | 30 | 40, 20 | Ferulic acid            |
| Ethyl gallate                          | - | 2.80       | 198.2 | 197 | 124, 125 | 30 | 30     | Ethyl gallate           |
| Taxifolin                              | - | 3.40       | 304.3 | 303 | 125, 177 | 34 | 22, 14 | Taxifolin               |
| Catechins                              |   |            |       |     |          |    |        |                         |
| Catechin                               | - | 1.40       | 290.3 | 289 | 109, 123 | 33 | 24, 26 | Catechin                |
| Epicatechin                            | - | 2.11       | 290.3 | 289 | 109, 123 | 33 | 24, 26 | Epicatechin             |

|                                    |   |                  |       |     |                 |    |        |                       |
|------------------------------------|---|------------------|-------|-----|-----------------|----|--------|-----------------------|
| (Epi)gallocatechin peak 1          | - | 0.80             | 306.3 | 305 | <i>125, 179</i> | 40 | 20, 14 | Catechin              |
| (Epi)gallocatechin peak 2          | - | 1.00             | 306.3 | 305 | <i>125, 179</i> | 40 | 20, 14 | Catechin              |
| Flavonols                          |   |                  |       |     |                 |    |        |                       |
| Quercetin                          | - | 4.29             | 302.2 | 301 | <i>151, 179</i> | 38 | 20, 18 | Quercetin             |
| Kaempferol                         | - | 4.52             | 286.2 | 285 | <i>146, 151</i> | 58 | 30, 18 | Quercetin             |
| Myricetin                          | - | 3.84             | 318.2 | 317 | <i>151, 179</i> | 46 | 26, 20 | Myricetin             |
| Kaempferol-3-glycs <sup>e</sup>    | - | 1.40             | 448.4 | 447 | <i>284</i>      | 42 | 18     | Quercetin-3-glucoside |
| Quercetin-3-glycs                  | - | 3.39             | 464.1 | 463 | <i>271, 300</i> | 42 | 40, 24 | Quercetin-3-glucoside |
| Quercetin-3-rutinoside             | - | 3.41             | 610.2 | 609 | <i>300</i>      | 42 | 24     | Quercetin             |
| Quercetin glucuronide <sup>f</sup> | - | 3.54, 3.80, 4.01 | 478.1 | 477 | <i>151, 300</i> | 42 | 38, 22 | Quercetin glucuronide |
| 4-OMe-quercetin                    | - | 4.62             | 316.2 | 315 | <i>151, 300</i> | 28 | 32, 20 | 4-OMe-quercetin       |
| Myricetin glucuronide              | - | 3.58             | 494.4 | 493 | <i>151, 317</i> | 46 | 26, 20 | Myricetin             |
| Hippuric Acids                     |   |                  |       |     |                 |    |        |                       |
| Hippuric acid                      | - | 1.80             | 179.2 | 178 | <i>56, 77</i>   | 28 | 12, 16 | Hippuric acid         |
| 3-OH-hippuric acid                 | - | 1.20             | 195.2 | 194 | <i>93, 121</i>  | 32 | 22, 24 | 3-OH-hippuric acid    |

MRM = Multiple Reaction Monitoring; RT = retention time; MW = molecular weight; CV = cone voltage; CE = collision energy.

<sup>a</sup> Daughter fragments monitored; fragment listed in italics used for quantitation.

<sup>b</sup> Three overlapping peaks were not separable, so quantitated as sum of all three peaks.

<sup>c</sup> Two distinct peaks were observed at this MRM, representing different isomers of ferulic acid glucuronide. They are quantitated separately as peaks 1 and 2 in the results.

<sup>d</sup> Two distinct peaks appeared at this MRM. Based on our methods, we are unable to determine which corresponds to ferulic acid sulfate and which corresponds to isoferulic acid sulfate, thus they are reported as peak 1 and peak 2 in results.

<sup>e</sup> Galactoside and glucoside peaks overlapped and were not distinguishable, so quantitated as sum of both peaks.

<sup>f</sup> Three distinct peaks were observed at this MRM, representing different isomers of quercetin glucuronide. They are quantitated separately as peaks 1, 2, and 3.

Table SI-2 – Differentially abundant taxa among all treatment groups at d90. Only taxa with LEfSe LDA>4 or ANCOM W>130 and centered log ratio (clr) >30 are presented. LEfSe determines differentially abundant taxa using relative abundance, while ANCOM uses raw counts.

| Taxa                                                                        | Phylum         | Lefse         |      |          | ANCOM |     |
|-----------------------------------------------------------------------------|----------------|---------------|------|----------|-------|-----|
|                                                                             |                | Highest Group | LDA  | p        | clr   | W   |
| <i>Bacteroides dorei</i>                                                    | Bacteroidetes  | High          | 5.09 | 3.46E-04 | 8.0   | 107 |
| <i>Bacteroides</i>                                                          | Bacteroidetes  | High          | 4.83 | 2.21E-05 | 3.2   | 51  |
| <i>Ruminococcus-2</i>                                                       | Firmicutes     | High          | 4.63 | 2.88E-03 | 2.3   | 36  |
| <i>Lachnospirillum</i>                                                      | Firmicutes     | High          | 4.30 | 1.27E-06 | 49.7  | 273 |
| <i>Barnesiella</i>                                                          | Bacteroidetes  | High          | 4.13 | 2.63E-06 | 26.0  | 264 |
| <i>Ruminococcus torques group</i>                                           | Firmicutes     | High          | 4.08 | 5.62E-07 | 16.7  | 263 |
| <i>Ruminococcaceae UBA1819</i>                                              | Firmicutes     | High          | 4.08 | 1.52E-04 | 25.8  | 267 |
| <i>Rhodospirillales</i> , uncultured,<br>ambiguous taxa                     | Proteobacteria | High          | 4.07 | 4.36E-05 | 9.5   | 191 |
| <i>Marvinbryantia</i>                                                       | Firmicutes     | High          | 4.02 | 5.37E-05 | 15.1  | 270 |
| <i>Coriobacteriales incertae sedis</i> ,<br>uncultured                      | Actinobacteria | High          | 3.11 | 2.35E-07 | 39.2  | 270 |
| <i>Flavonifractor</i>                                                       | Firmicutes     | High          | 3.83 | 1.91E-06 | 30.5  | 270 |
| <i>Muribaculaceae</i> , ambiguous taxa                                      | Bacteroidetes  | Medium        | 4.40 | 1.24E-02 | 43.7  | 240 |
| <i>Bacteroides</i> , uncultured bacterium                                   | Bacteroidetes  | Medium        | 4.15 | 2.47E-05 | 10.5  | 229 |
| <i>Rikenellaceae RC9 gut group</i> ,<br>uncultured bacterium                | Bacteroidetes  | Medium        | 4.08 | 2.69E-04 | 173.6 | 261 |
| <i>Christensenellaceae R7 group</i>                                         | Firmicutes     | Medium        | 4.08 | 3.79E-03 | 3.2   | 46  |
| <i>Oscillibacter</i> , uncultured<br>bacterium                              | Firmicutes     | Medium        | 3.28 | 2.65E-04 | 37.2  | 242 |
| <i>Clostridium sensu stricto</i> ,<br>uncultured bacterium                  | Firmicutes     | Low           | 3.85 | 6.42E-04 | 37.4  | 252 |
| <i>Ruminiclostridium-6</i> , uncultured<br>bacterium                        | Firmicutes     | BB            | 4.37 | 7.58E-04 | 28.2  | 253 |
| <i>Ruminococcaceae UCG-005</i>                                              | Firmicutes     | BB            | 4.36 | 1.57E-04 | 35.3  | 254 |
| <i>Ruminiclostridium</i> , uncultured<br>bacterium                          | Firmicutes     | BB            | 3.43 | 6.16E-04 | 72.5  | 248 |
| <i>Ruminococcus-1</i>                                                       | Firmicutes     | Control       | 5.16 | 1.67E-04 | 74.1  | 269 |
| <i>Ruminococcaceae UCG-010</i>                                              | Firmicutes     | Control       | 3.15 | 1.07E-04 | 48.1  | 242 |
| <i>Lachnospiraceae NK4A136 group</i>                                        | Firmicutes     | Non-gavage    | 4.88 | 5.91E-04 | 76.5  | 265 |
| <i>Lachnospiraceae NK4A136 group</i> ,<br>uncultured bacterium              | Firmicutes     | Non-gavage    | 4.74 | 8.91E-04 | 61.7  | 258 |
| <i>Eubacterium coprostanoligenes</i><br><i>group</i> , uncultured bacterium | Firmicutes     | Non-gavage    | 4.02 | 8.79E-05 | 23.7  | 248 |

Figure SI-1a – Hippuric acid.

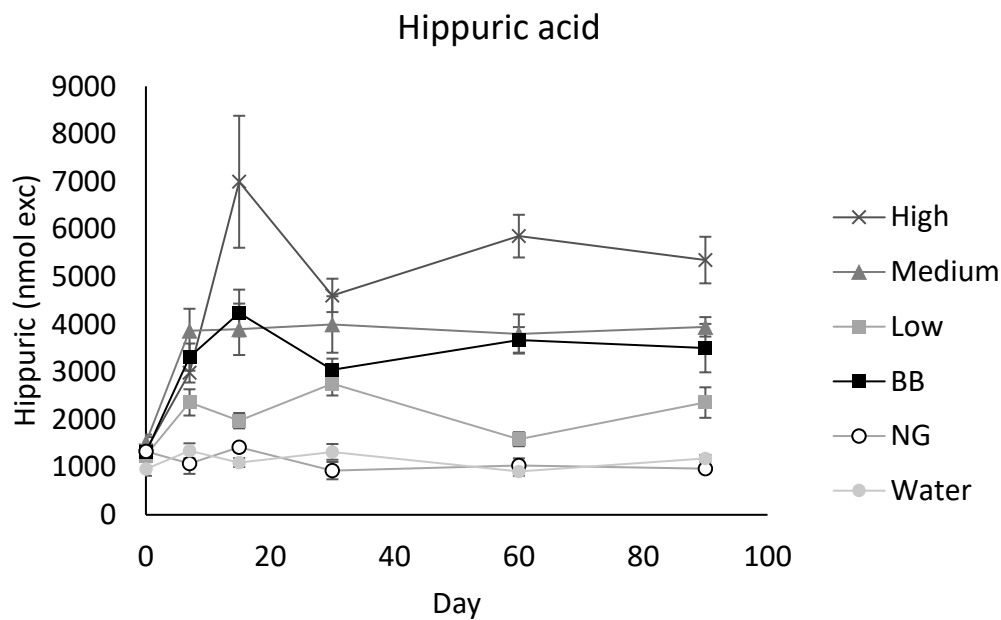

|        | Day                     |                            |                             |                             |                            |                             |
|--------|-------------------------|----------------------------|-----------------------------|-----------------------------|----------------------------|-----------------------------|
|        | 0                       | 7                          | 15                          | 30                          | 60                         | 90                          |
| Water  | 963 ± 453               | 1345 ± 497 <sup>b</sup>    | 1098 ± 297 <sup>d</sup>     | 1322 ± 496 <sup>c</sup>     | 911 ± 286 <sup>d</sup>     | 1187 ± 211 <sup>c</sup>     |
| Low    | 1247 ± 419 <sup>C</sup> | 2361 ± 871 <sup>a,A</sup>  | 1977 ± 510 <sup>c,AB</sup>  | 2755 ± 788 <sup>b,A</sup>   | 1588 ± 465 <sup>c,BC</sup> | 2358 ± 1014 <sup>b,AB</sup> |
| Medium | 1518 ± 501 <sup>B</sup> | 3867 ± 1383 <sup>a,A</sup> | 3896 ± 1529 <sup>b,A</sup>  | 3998 ± 1781 <sup>ab,A</sup> | 3799 ± 1164 <sup>b,A</sup> | 3948 ± 579 <sup>a,A</sup>   |
| High   | 1352 ± 380 <sup>C</sup> | 2986 ± 623 <sup>a,B</sup>  | 6995 ± 4158 <sup>a,A</sup>  | 4609 ± 1052 <sup>a,A</sup>  | 5854 ± 1418 <sup>a,A</sup> | 5351 ± 1383 <sup>a,A</sup>  |
| BB     | 1310 ± 485 <sup>B</sup> | 3312 ± 856 <sup>a,A</sup>  | 4239 ± 1471 <sup>ab,A</sup> | 3045 ± 704 <sup>ab,A</sup>  | 3674 ± 805 <sup>ab,A</sup> | 3501 ± 1245 <sup>ab,A</sup> |
| NG     | 1329 ± 608              | 1079 ± 438 <sup>b</sup>    | 1419 ± 175 <sup>cd</sup>    | 928 ± 363 <sup>c</sup>      | 1035 ± 303 <sup>cd</sup>   | 968 ± 124 <sup>c</sup>      |

Figure SI-1b – 3-hydroxy-hippuric acid.

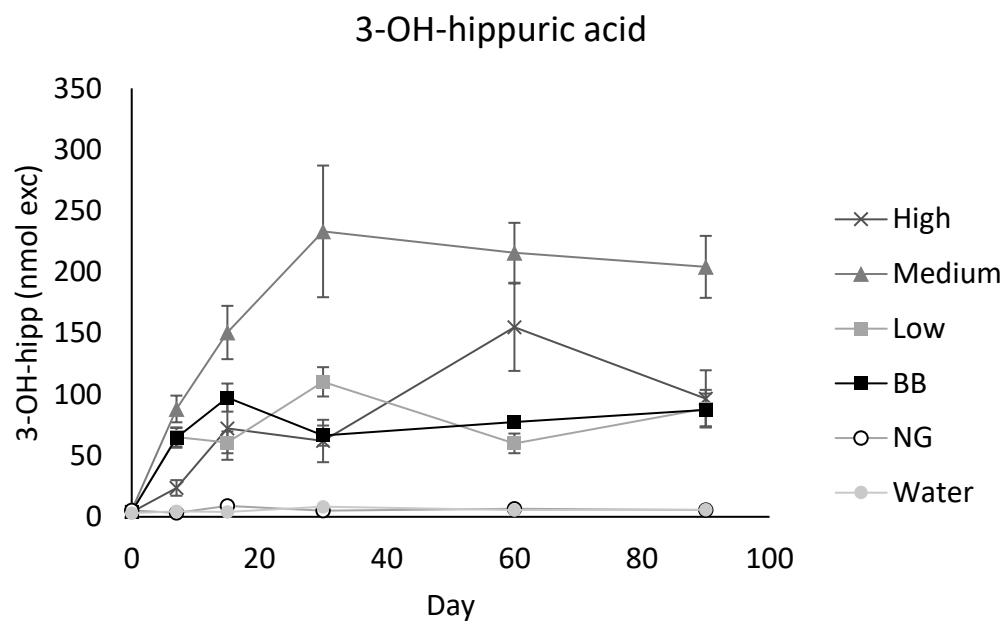

|        | Day                      |                             |                             |                             |                             |                             |
|--------|--------------------------|-----------------------------|-----------------------------|-----------------------------|-----------------------------|-----------------------------|
|        | 0                        | 7                           | 15                          | 30                          | 60                          | 90                          |
| Water  | 2.98 ± 1.41              | 4.60 ± 1.88 <sup>c</sup>    | 4.03 ± 1.07 <sup>d</sup>    | 8.27 ± 3.49 <sup>d</sup>    | 5.60 ± 1.50 <sup>d</sup>    | 5.72 ± 1.38 <sup>c</sup>    |
| Low    | 4.09 ± 1.61 <sup>C</sup> | 65.2 ± 24.8 <sup>a,B</sup>  | 60.8 ± 28.2 <sup>bc,B</sup> | 110 ± 37.8 <sup>ab,A</sup>  | 60.0 ± 25.4 <sup>c,B</sup>  | 88.3 ± 48.7 <sup>b,AB</sup> |
| Medium | 5.37 ± 1.65 <sup>C</sup> | 88.1 ± 32.7 <sup>a,B</sup>  | 151 ± 61.6 <sup>a,AB</sup>  | 233. ± 161 <sup>a,A</sup>   | 216 ± 69.2 <sup>a,A</sup>   | 204 ± 71.6 <sup>a,A</sup>   |
| High   | 3.84 ± 1.05 <sup>D</sup> | 23.6 ± 19.1 <sup>bc,C</sup> | 72.2 ± 76.8 <sup>c,B</sup>  | 61.9 ± 51.9 <sup>c,B</sup>  | 155 ± 113 <sup>ab,A</sup>   | 96.5 ± 65.5 <sup>a,A</sup>  |
| BB     | 4.19 ± 1.92 <sup>B</sup> | 64.5 ± 24.2 <sup>a,A</sup>  | 97.4 ± 34.4 <sup>ab,A</sup> | 66.3 ± 24.7 <sup>bc,A</sup> | 77.3 ± 14.4 <sup>bc,A</sup> | 87.3 ± 32.7 <sup>b,A</sup>  |
| NG     | 5.23 ± 2.29              | 3.21 ± 1.60 <sup>c</sup>    | 8.93 ± 0.62 <sup>d</sup>    | 5.06 ± 0.71 <sup>a</sup>    | 6.49 ± 2.35 <sup>d</sup>    | 5.65 ± 1.80 <sup>c</sup>    |

Figure SI-2a – Vanillic acid.

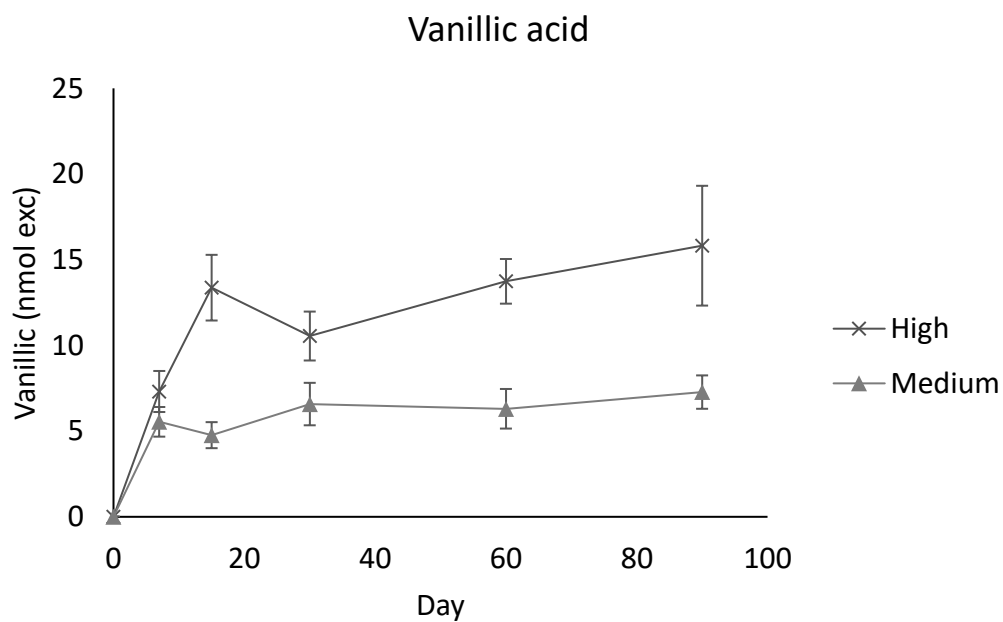

|        | Day |                            |                            |                             |                            |                            |       |
|--------|-----|----------------------------|----------------------------|-----------------------------|----------------------------|----------------------------|-------|
|        | 0   | 7                          | 15                         | 30                          | 60                         | 90                         |       |
| Water  | nd  | nd                         | nd                         | nd                          | nd                         | nd                         | nd    |
| Low    | nd  | trace                      | trace                      | trace                       | trace                      | trace                      | trace |
| Medium | nd  | 5.54 ± 2.60 <sup>b</sup>   | 4.76 ± 2.15 <sup>b</sup>   | 6.58 ± 3.71 <sup>b</sup>    | 6.30 ± 3.27 <sup>b</sup>   | 7.28 ± 2.75 <sup>b</sup>   |       |
| High   | nd  | 7.31 ± 3.59 <sup>a,B</sup> | 13.4 ± 5.75 <sup>a,A</sup> | 10.6 ± 4.28 <sup>a,AB</sup> | 13.7 ± 4.12 <sup>a,A</sup> | 15.8 ± 9.89 <sup>a,A</sup> |       |
| BB     | nd  | trace                      | trace                      | trace                       | trace                      | trace                      | trace |
| NG     | nd  | nd                         | nd                         | nd                          | nd                         | nd                         | nd    |



Figure SI-2b – Syringic acid.

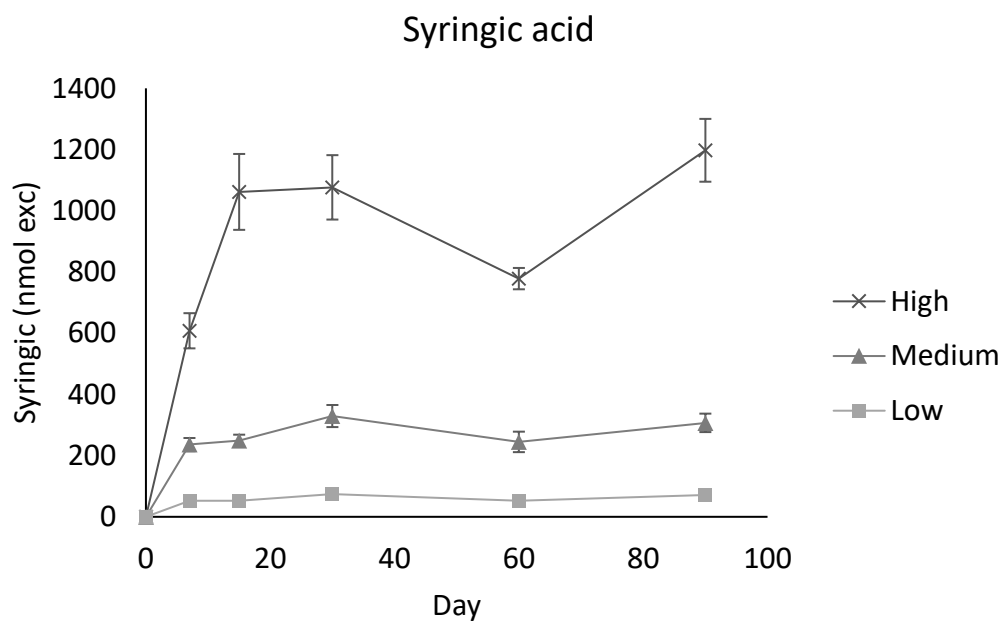

|        | Day |                             |                             |                            |                            |                             |
|--------|-----|-----------------------------|-----------------------------|----------------------------|----------------------------|-----------------------------|
|        | 0   | 7                           | 15                          | 30                         | 60                         | 90                          |
| Water  | nd  | nd                          | nd                          | nd                         | nd                         | nd                          |
| Low    | nd  | 52.8 ± 8.82 <sup>c,AB</sup> | 52.1 ± 13.4 <sup>c,AB</sup> | 74.3 ± 29.2 <sup>c,A</sup> | 52.7 ± 19.9 <sup>c,B</sup> | 71.6 ± 27.0 <sup>c,AB</sup> |
| Medium | nd  | 236 ± 64.6 <sup>b</sup>     | 249 ± 54.9 <sup>b</sup>     | 329 ± 108 <sup>b</sup>     | 245 ± 94.7 <sup>b</sup>    | 307 ± 85.3 <sup>b</sup>     |
| High   | nd  | 608 ± 172 <sup>a,C</sup>    | 1062 ± 372 <sup>a,AB</sup>  | 1076 ± 316 <sup>a,AB</sup> | 778 ± 110 <sup>a,B</sup>   | 1197 ± 290 <sup>a,A</sup>   |
| BB     | nd  | trace                       | trace                       | trace                      | trace                      | trace                       |
| NG     | nd  | nd                          | nd                          | nd                         | nd                         | nd                          |

Figure SI-2c – 3-hydroxyphenyl propionic acid.

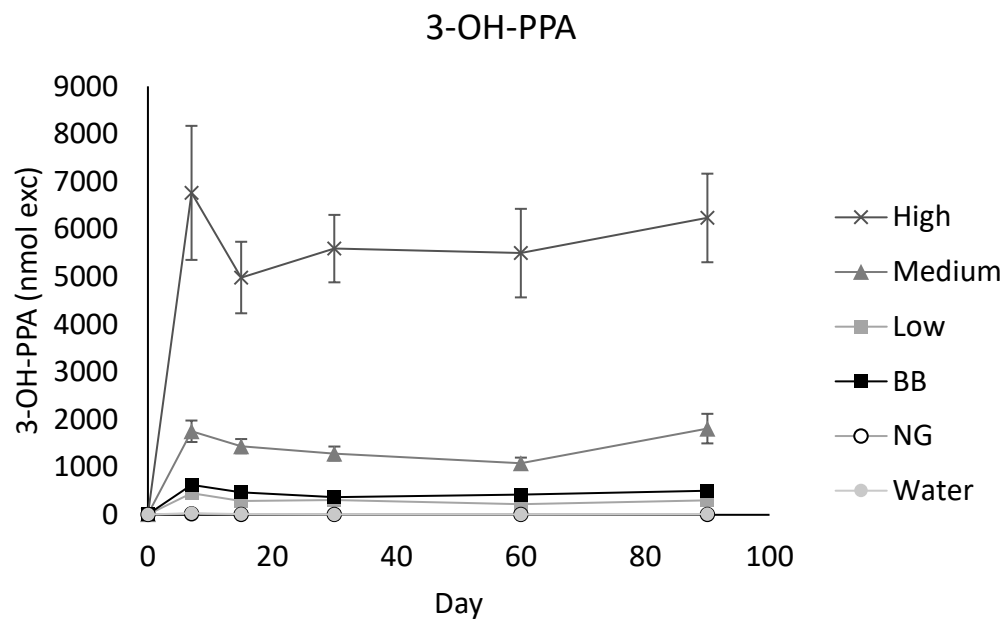

|        | Day                      |                            |                            |                            |                            |                            |
|--------|--------------------------|----------------------------|----------------------------|----------------------------|----------------------------|----------------------------|
|        | 0                        | 7                          | 15                         | 30                         | 60                         | 90                         |
| Water  | 5.70 ± 3.18              | 35.3 ± 36.8 <sup>d</sup>   | 12.3 ± 5.07 <sup>d</sup>   | 10.4 ± 4.50 <sup>d</sup>   | 7.05 ± 1.67 <sup>d</sup>   | 12.5 ± 5.41 <sup>d</sup>   |
| Low    | 5.98 ± 3.39 <sup>C</sup> | 454 ± 132 <sup>c,A</sup>   | 290 ± 107 <sup>c,AB</sup>  | 311 ± 109 <sup>c,AB</sup>  | 221 ± 70.5 <sup>c,B</sup>  | 305 ± 60.8 <sup>c,AB</sup> |
| Medium | 12.0 ± 7.35 <sup>B</sup> | 1755 ± 677 <sup>b,A</sup>  | 1442 ± 422 <sup>b,A</sup>  | 1287 ± 441 <sup>b,A</sup>  | 1081 ± 341 <sup>b,A</sup>  | 1811 ± 879 <sup>b,A</sup>  |
| High   | 7.46 ± 6.26 <sup>B</sup> | 6762 ± 4224 <sup>a,A</sup> | 4984 ± 2253 <sup>a,A</sup> | 5591 ± 2124 <sup>a,A</sup> | 5497 ± 2941 <sup>a,A</sup> | 6235 ± 2631 <sup>a,A</sup> |
| BB     | 10.4 ± 9.14 <sup>B</sup> | 629 ± 228 <sup>c,A</sup>   | 470 ± 99.0 <sup>c,A</sup>  | 370 ± 58.1 <sup>c,A</sup>  | 427 ± 169 <sup>c,A</sup>   | 507 ± 255 <sup>c,A</sup>   |
| NG     | 7.82 ± 5.62              | 21.3 ± 19.4 <sup>d</sup>   | 10.6 ± 2.81 <sup>d</sup>   | 8.40 ± 4.89 <sup>d</sup>   | 10.5 ± 2.80 <sup>d</sup>   | 11.2 ± 4.18 <sup>d</sup>   |

Figure SI-2d – 3-hydroxy-4-methoxyphenyl propionic acid.

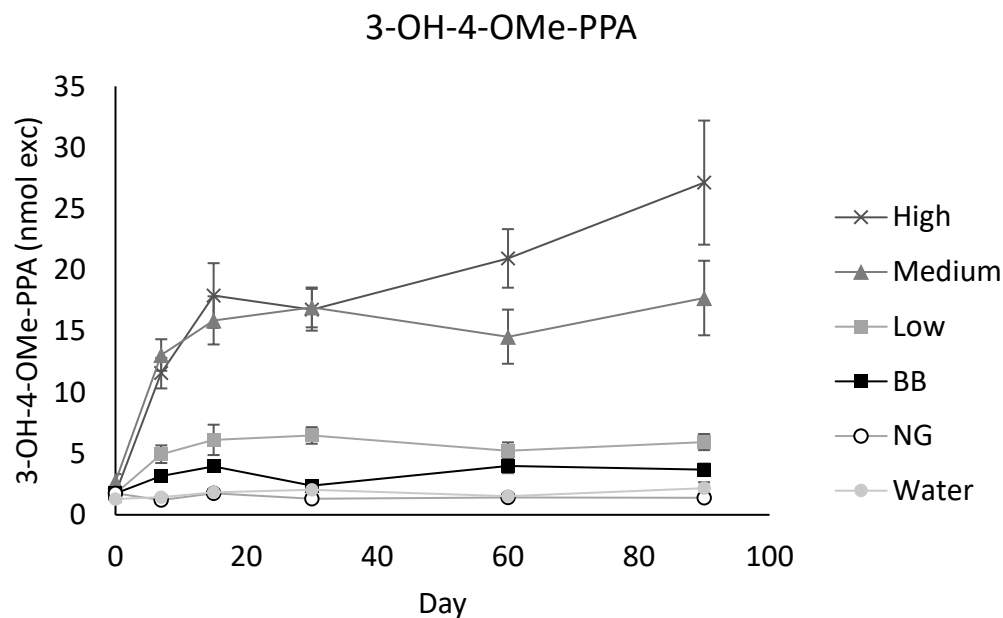

|        | Day               |                        |                         |                         |                        |                         |
|--------|-------------------|------------------------|-------------------------|-------------------------|------------------------|-------------------------|
|        | 0                 | 7                      | 15                      | 30                      | 60                     | 90                      |
| Water  | $1.29 \pm 0.83$   | $1.44 \pm 0.59^c$      | $1.84 \pm 0.81^c$       | $2.05 \pm 0.72^c$       | $1.51 \pm 0.86^c$      | $2.18 \pm 1.45^c$       |
| Low    | $1.74 \pm 1.2^B$  | $4.95 \pm 2.28^{b,A}$  | $6.12 \pm 3.92^{b,A}$   | $6.48 \pm 2.14^{b,A}$   | $5.24 \pm 2.14^{b,A}$  | $5.94 \pm 2.08^{b,A}$   |
| Medium | $2.72 \pm 1.82^B$ | $13.05 \pm 3.87^{a,A}$ | $15.88 \pm 5.56^{a,A}$  | $16.94 \pm 4.88^{a,A}$  | $14.55 \pm 6.25^{a,A}$ | $17.71 \pm 8.61^{a,A}$  |
| High   | $1.75 \pm 0.5^C$  | $11.57 \pm 3.74^{a,B}$ | $17.92 \pm 7.92^{a,AB}$ | $16.75 \pm 5.12^{a,AB}$ | $20.94 \pm 7.56^{a,A}$ | $27.13 \pm 14.33^{a,A}$ |
| BB     | $1.74 \pm 0.83^B$ | $3.17 \pm 0.9^{b,A}$   | $3.96 \pm 0.89^{b,A}$   | $2.39 \pm 0.59^{c,A}$   | $3.99 \pm 1.76^{b,A}$  | $3.68 \pm 1.25^{bc,A}$  |
| NG     | $1.75 \pm 0.59$   | $1.2 \pm 0.4^c$        | $1.76 \pm 0.61^c$       | $1.31 \pm 0.4^c$        | $1.42 \pm 0.35^a$      | $1.4 \pm 0.4^c$         |

Figure SI-2e – Dihydrocaffeic acid sulfate.

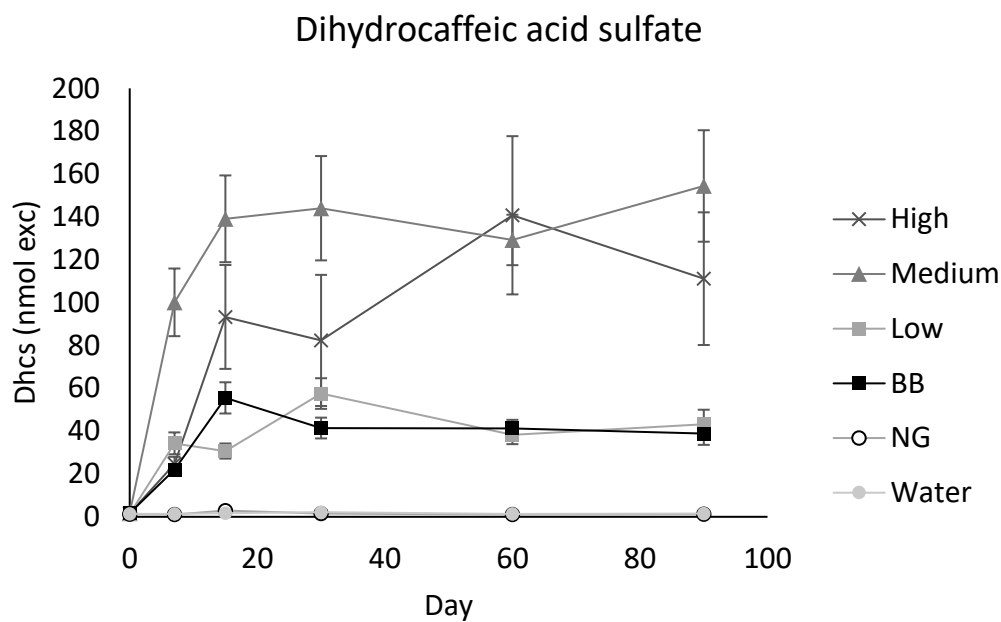

|        | Day               |                          |                          |                          |                         |                          |
|--------|-------------------|--------------------------|--------------------------|--------------------------|-------------------------|--------------------------|
|        | 0                 | 7                        | 15                       | 30                       | 60                      | 90                       |
| Water  | $1.36 \pm 1.05$   | $1.4 \pm 0.88^c$         | $1.7 \pm 0.66^d$         | $2.18 \pm 1.06^c$        | $1.33 \pm 0.54^c$       | $1.49 \pm 0.48^c$        |
| Low    | $1.36 \pm 0.65^c$ | $34.29 \pm 16.15^{b,AB}$ | $30.7 \pm 11.17^{c,B}$   | $57.54 \pm 22.61^{b,A}$  | $38.3 \pm 13.83^{b,AB}$ | $43.17 \pm 21.54^{b,AB}$ |
| Medium | $1.72 \pm 1.03^B$ | $100 \pm 47.38^{a,A}$    | $139 \pm 57.28^{a,A}$    | $144 \pm 73.04^{a,A}$    | $129 \pm 33.3^{a,A}$    | $154 \pm 73.59^{a,A}$    |
| High   | $1.6 \pm 0.75^D$  | $24.72 \pm 9.87^{b,C}$   | $93.3 \pm 72.75^{ab,AB}$ | $82.33 \pm 91.81^{b,B}$  | $141 \pm 117^{a,A}$     | $111 \pm 87.57^{ab,AB}$  |
| BB     | $1.72 \pm 0.6^c$  | $22.01 \pm 7.51^{b,B}$   | $55.51 \pm 21.85^{bc,A}$ | $41.44 \pm 14.56^{b,AB}$ | $41.26 \pm 12.0^{b,AB}$ | $38.79 \pm 12.75^{b,AB}$ |
| NG     | $1.21 \pm 1.05$   | $1.13 \pm 0.14^c$        | $2.91 \pm 0.26^d$        | $1.51 \pm 0.92^c$        | $1.03 \pm 0.36^c$       | $1.15 \pm 0.51^c$        |

Figure SI-2f – Caffeic acid.

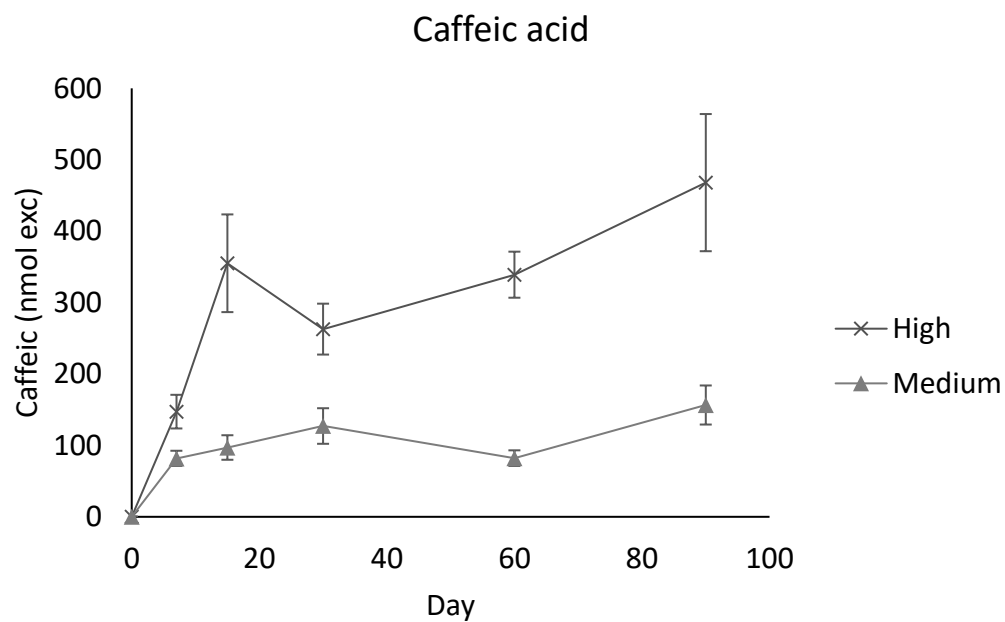

|        | Day |                             |                            |                               |                          |                            |       |
|--------|-----|-----------------------------|----------------------------|-------------------------------|--------------------------|----------------------------|-------|
|        | 0   | 7                           | 15                         | 30                            | 60                       | 90                         |       |
| Water  | nd  | nd                          | nd                         | nd                            | nd                       | nd                         | nd    |
| Low    | nd  | trace                       | trace                      | trace                         | trace                    | trace                      | trace |
| Medium | nd  | 81.8 ± 31.9 <sup>b</sup>    | 97 ± 48.6 <sup>b</sup>     | 127.2 ± 74.7 <sup>b</sup>     | 82.2 ± 30.9 <sup>b</sup> | 156.6 ± 77.4 <sup>b</sup>  |       |
| High   | nd  | 147.3 ± 70.6 <sup>a,B</sup> | 355 ± 205.2 <sup>a,A</sup> | 262.8 ± 106.9 <sup>a,AB</sup> | 339 ± 102 <sup>a,A</sup> | 468 ± 271.6 <sup>a,A</sup> |       |
| BB     | nd  | trace                       | trace                      | trace                         | trace                    | trace                      | trace |
| NG     | nd  | nd                          | nd                         | nd                            | nd                       | nd                         | nd    |

Figure SI-2g – Caffeic acid glucuronide.

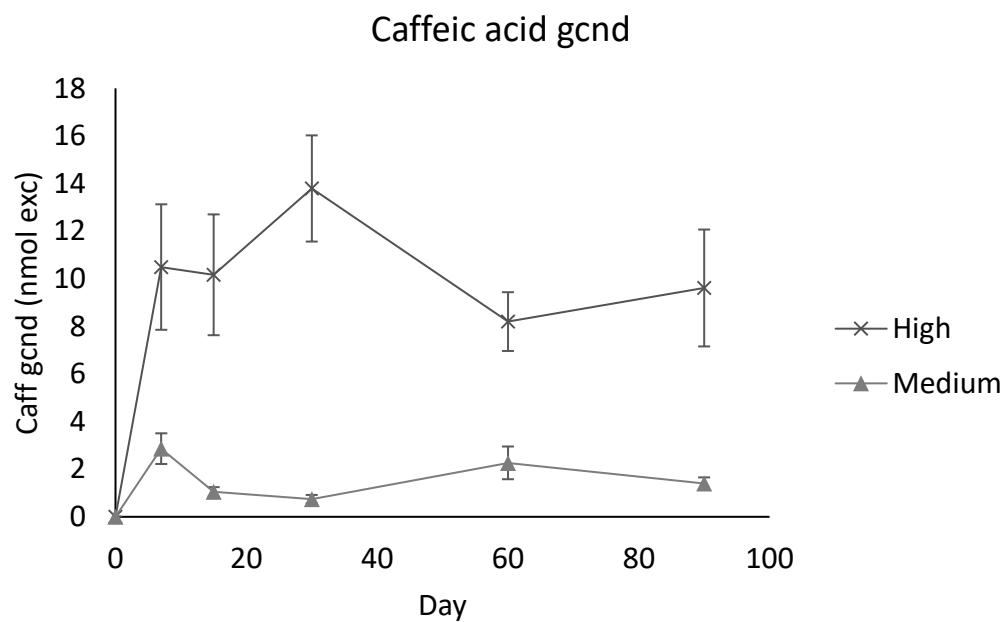

|        | Day |                            |                             |                            |                             |                            |  |
|--------|-----|----------------------------|-----------------------------|----------------------------|-----------------------------|----------------------------|--|
|        | 0   | 7                          | 15                          | 30                         | 60                          | 90                         |  |
| Water  | nd  | nd                         | nd                          | nd                         | nd                          | nd                         |  |
| Low    | nd  | nd                         | nd                          | nd                         | nd                          | nd                         |  |
| Medium | nd  | 2.86 ± 1.93 <sup>b,A</sup> | 1.05 ± 0.56 <sup>b,AB</sup> | 0.75 ± 0.52 <sup>b,B</sup> | 2.27 ± 1.95 <sup>b,AB</sup> | 1.4 ± 0.71 <sup>b,AB</sup> |  |
| High   | nd  | 10.49 ± 7.91 <sup>a</sup>  | 10.17 ± 7.61 <sup>a</sup>   | 13.79 ± 6.69 <sup>a</sup>  | 8.2 ± 3.9 <sup>a</sup>      | 9.61 ± 6.95 <sup>a</sup>   |  |
| BB     | nd  | nd                         | nd                          | nd                         | nd                          | nd                         |  |
| NG     | nd  | nd                         | nd                          | nd                         | nd                          | nd                         |  |

Figure SI-2h – Caffeic acid sulfate.

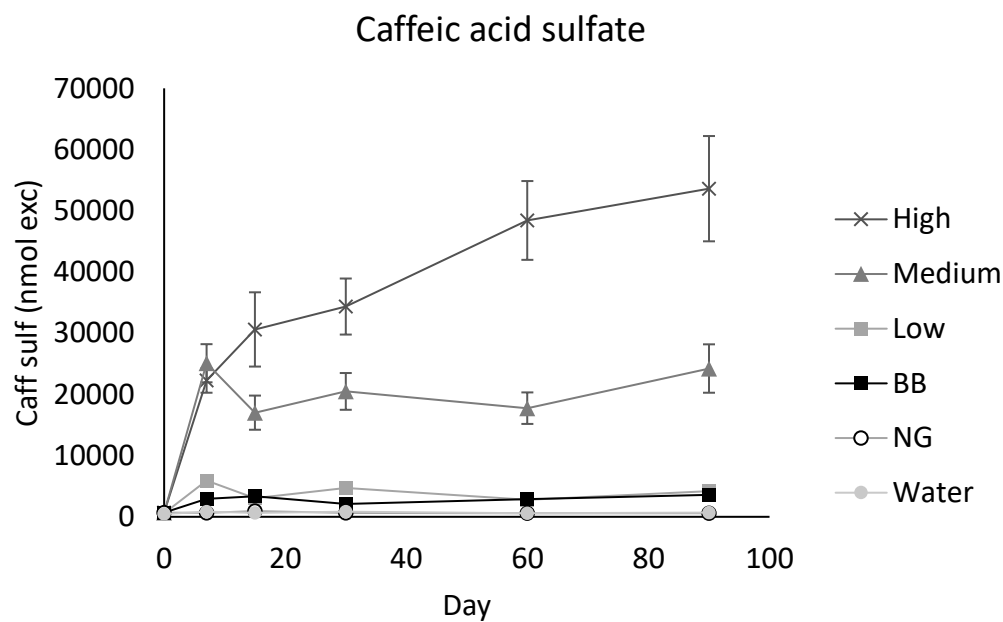

|        | Day                    |                             |                              |                               |                              |                              |
|--------|------------------------|-----------------------------|------------------------------|-------------------------------|------------------------------|------------------------------|
|        | 0                      | 7                           | 15                           | 30                            | 60                           | 90                           |
| Water  | 457 ± 211              | 822 ± 332 <sup>d</sup>      | 620 ± 163 <sup>c</sup>       | 836 ± 64 <sup>d</sup>         | 595 ± 97 <sup>d</sup>        | 713 ± 102 <sup>d</sup>       |
| Low    | 581 ± 252 <sup>D</sup> | 5919 ± 2138 <sup>b,A</sup>  | 3064 ± 904 <sup>b,BC</sup>   | 4721 ± 1736 <sup>b,AB</sup>   | 2768 ± 1014 <sup>c,C</sup>   | 4203 ± 1745 <sup>c,ABC</sup> |
| Medium | 665 ± 251 <sup>B</sup> | 25089 ± 9344 <sup>a,A</sup> | 17014 ± 7887 <sup>a,A</sup>  | 20487 ± 9008 <sup>a,A</sup>   | 17749 ± 7281 <sup>b,A</sup>  | 24222 ± 11182 <sup>b,A</sup> |
| High   | 707 ± 157 <sup>C</sup> | 22268 ± 5987 <sup>a,B</sup> | 30611 ± 18198 <sup>a,B</sup> | 34349 ± 13737 <sup>a,AB</sup> | 48414 ± 20353 <sup>a,A</sup> | 53605 ± 24325 <sup>a,A</sup> |
| BB     | 685 ± 291 <sup>B</sup> | 2914 ± 818 <sup>c,A</sup>   | 3346 ± 959 <sup>b,A</sup>    | 2123 ± 698 <sup>c,A</sup>     | 2870 ± 301 <sup>c,A</sup>    | 3585 ± 1554 <sup>c,A</sup>   |
| NG     | 670 ± 380              | 615 ± 236 <sup>d</sup>      | 941 ± 208 <sup>c</sup>       | 642 ± 107 <sup>d</sup>        | 579 ± 176 <sup>d</sup>       | 593 ± 151 <sup>d</sup>       |

Figure SI-2i – Ferulic acid.

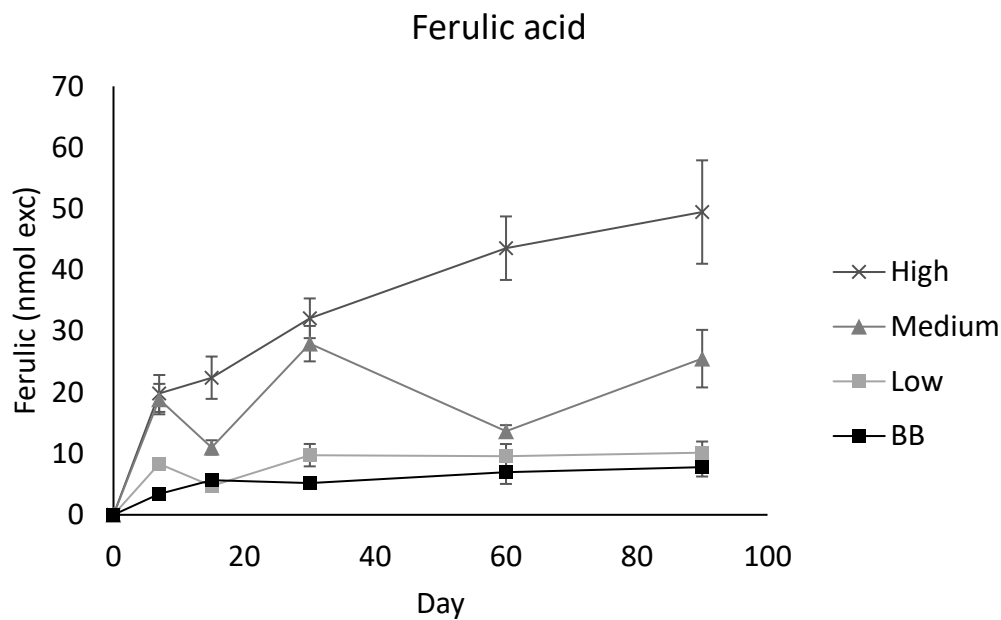

|        | Day |                              |                             |                              |                              |                              |
|--------|-----|------------------------------|-----------------------------|------------------------------|------------------------------|------------------------------|
|        | 0   | 7                            | 15                          | 30                           | 60                           | 90                           |
| Water  | nd  | nd                           | nd                          | nd                           | nd                           | nd                           |
| Low    | nd  | 8.3 ± 2.92 <sup>b,A</sup>    | 4.71 ± 2.95 <sup>b,B</sup>  | 9.75 ± 5.78 <sup>b,A</sup>   | 9.59 ± 6.24 <sup>bc,A</sup>  | 10.15 ± 5.76 <sup>b,A</sup>  |
| Medium | nd  | 18.9 ± 7.45 <sup>a,ABC</sup> | 11.01 ± 3.3 <sup>a,C</sup>  | 27.96 ± 8.68 <sup>a,A</sup>  | 13.65 ± 2.82 <sup>b,BC</sup> | 25.51 ± 13.3 <sup>a,AB</sup> |
| High   | nd  | 19.83 ± 9.05 <sup>a,B</sup>  | 22.4 ± 10.37 <sup>a,B</sup> | 32.11 ± 9.73 <sup>a,AB</sup> | 43.56 ± 16.41 <sup>a,A</sup> | 49.46 ± 23.9 <sup>a,A</sup>  |
| BB     | nd  | 3.42 ± 1.16 <sup>c,B</sup>   | 5.65 ± 3.03 <sup>b,AB</sup> | 5.18 ± 2.07 <sup>b,AB</sup>  | 6.94 ± 5.69 <sup>c,AB</sup>  | 7.78 ± 3.74 <sup>b,A</sup>   |
| NG     | nd  | nd                           | nd                          | nd                           | nd                           | nd                           |



Figure SI-2j – Isoferulic acid.

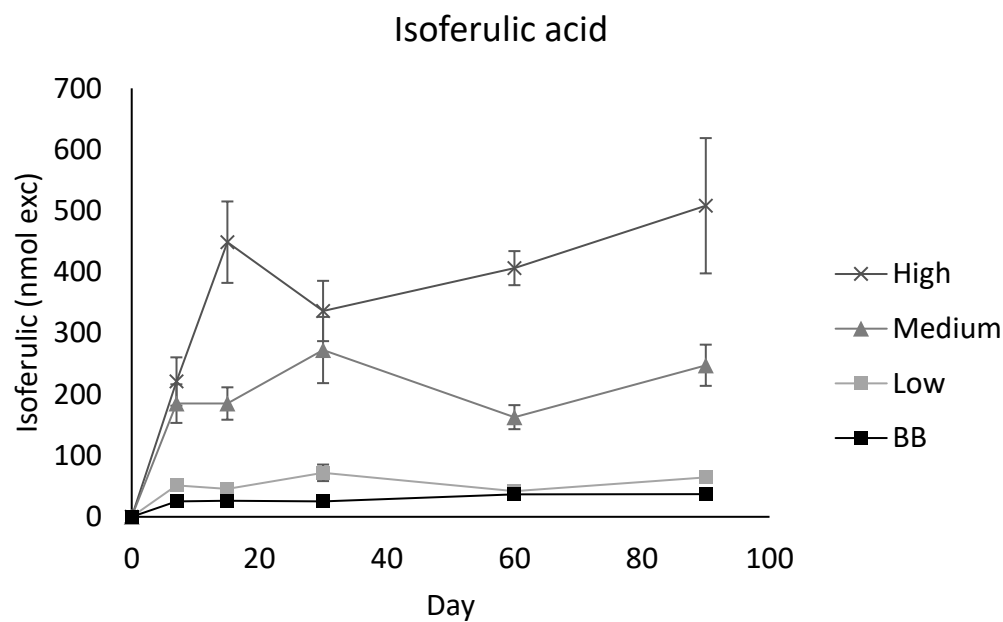

|        | Day |                              |                              |                               |                           |                              |
|--------|-----|------------------------------|------------------------------|-------------------------------|---------------------------|------------------------------|
|        | 0   | 7                            | 15                           | 30                            | 60                        | 90                           |
| Water  | nd  | nd                           | nd                           | nd                            | nd                        | nd                           |
| Low    | nd  | 51.4 ± 27.7 <sup>b</sup>     | 45.8 ± 24 <sup>c</sup>       | 71.9 ± 42.8 <sup>b</sup>      | 42 ± 19.5 <sup>c</sup>    | 64.3 ± 11.7 <sup>b</sup>     |
| Medium | nd  | 184.9 ± 94.6 <sup>a</sup>    | 185.1 ± 74.9 <sup>b</sup>    | 272.5 ± 162.2 <sup>a</sup>    | 162.8 ± 55.6 <sup>b</sup> | 247.6 ± 95.2 <sup>a</sup>    |
| High   | nd  | 221.1 ± 118.4 <sup>a,B</sup> | 448.7 ± 199.5 <sup>a,A</sup> | 336.3 ± 147.7 <sup>a,AB</sup> | 406.3 ± 88 <sup>a,A</sup> | 508.2 ± 312.6 <sup>a,A</sup> |
| BB     | nd  | 25.3 ± 12.8 <sup>c</sup>     | 26.4 ± 14 <sup>c</sup>       | 25 ± 7.8 <sup>c</sup>         | 36.5 ± 18.8 <sup>c</sup>  | 37.1 ± 19.2 <sup>b</sup>     |
| NG     | nd  | nd                           | nd                           | nd                            | nd                        | nd                           |

Figure SI-2k – Ferulic acid glucuronide peak 1.

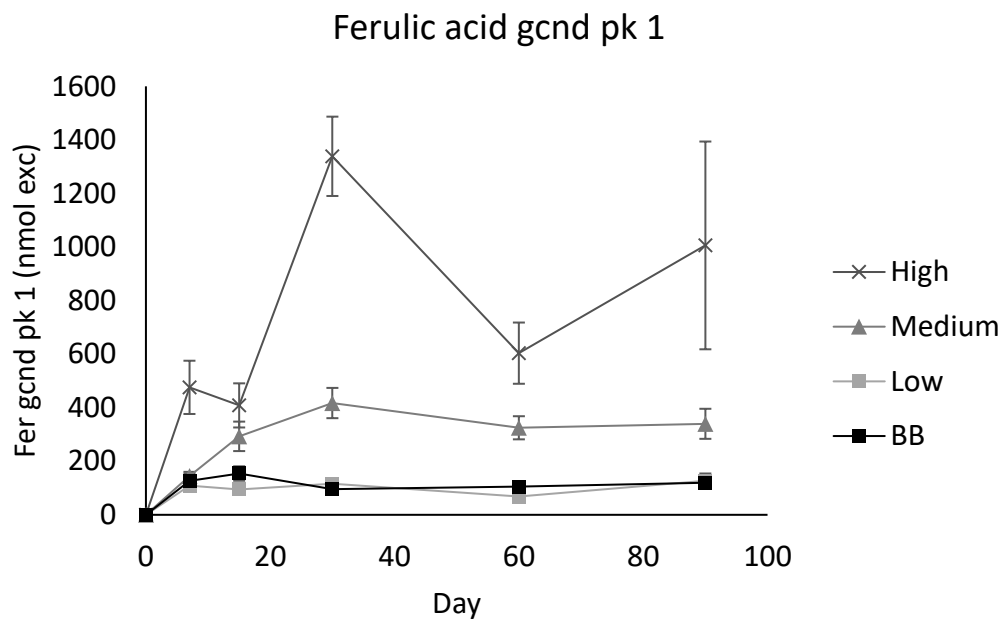

|        | Day |                              |                              |                               |                              |                              |    |
|--------|-----|------------------------------|------------------------------|-------------------------------|------------------------------|------------------------------|----|
|        | 0   | 7                            | 15                           | 30                            | 60                           | 90                           |    |
| Water  | nd  | nd                           | nd                           | nd                            | nd                           | nd                           | nd |
| Low    | nd  | 108.5 ± 47.1 <sup>b</sup>    | 94.3 ± 39.2 <sup>c</sup>     | 115.7 ± 56.4 <sup>a</sup>     | 68 ± 27.8 <sup>b</sup>       | 127 ± 86.2 <sup>b</sup>      |    |
| Medium | nd  | 144.6 ± 47.6 <sup>b,B</sup>  | 293 ± 155.6 <sup>ab,AB</sup> | 417.4 ± 169.6 <sup>b,A</sup>  | 324.9 ± 122.1 <sup>a,A</sup> | 339.8 ± 158.7 <sup>a,A</sup> |    |
| High   | nd  | 475.9 ± 298.3 <sup>a,B</sup> | 408.5 ± 247.2 <sup>a,B</sup> | 1338.6 ± 444.3 <sup>a,A</sup> | 603.6 ± 361.4 <sup>a,B</sup> | 1006 ± 1097 <sup>a,B</sup>   |    |
| BB     | nd  | 126.9 ± 80.3 <sup>b</sup>    | 154.2 ± 80.7 <sup>bc</sup>   | 95.4 ± 34.2 <sup>a</sup>      | 105.5 ± 30.7 <sup>b</sup>    | 120.3 ± 42.4 <sup>b</sup>    |    |
| NG     | nd  | nd                           | nd                           | nd                            | nd                           | nd                           |    |

Figure SI-21 – Ferulic acid glucuronide peak 2.

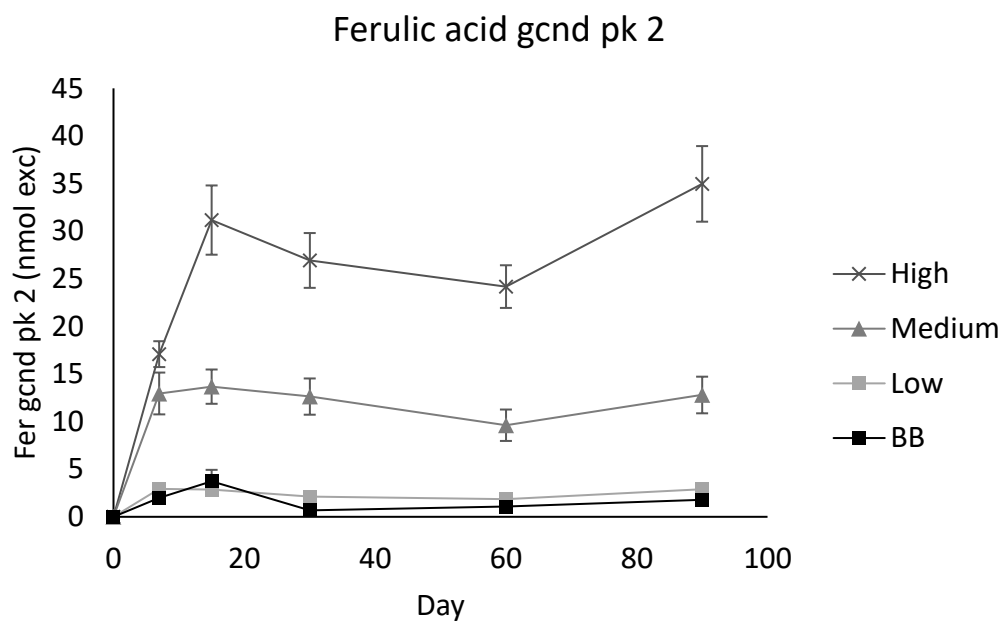

|        | Day |                            |                            |                            |                             |                             |
|--------|-----|----------------------------|----------------------------|----------------------------|-----------------------------|-----------------------------|
|        | 0   | 7                          | 15                         | 30                         | 60                          | 90                          |
| Water  | nd  | nd                         | nd                         | nd                         | nd                          | nd                          |
| Low    | nd  | 2.93 ± 1.17 <sup>b</sup>   | 2.87 ± 1.31 <sup>c</sup>   | 2.11 ± 1.46 <sup>c</sup>   | 1.85 ± 0.9 <sup>c</sup>     | 2.89 ± 1.28 <sup>c</sup>    |
| Medium | nd  | 12.95 ± 6.59 <sup>a</sup>  | 13.67 ± 5.09 <sup>b</sup>  | 12.63 ± 5.71 <sup>b</sup>  | 9.62 ± 4.67 <sup>b</sup>    | 12.79 ± 5.44 <sup>b</sup>   |
| High   | nd  | 17.08 ± 4.07 <sup>a</sup>  | 31.16 ± 10.91 <sup>a</sup> | 26.92 ± 8.63 <sup>a</sup>  | 24.18 ± 7.09 <sup>a</sup>   | 34.97 ± 11.23 <sup>a</sup>  |
| BB     | nd  | 2.0 ± 1.31 <sup>b,AB</sup> | 3.73 ± 3.61 <sup>c,A</sup> | 0.68 ± 0.45 <sup>d,C</sup> | 1.08 ± 0.52 <sup>c,BC</sup> | 1.78 ± 1.02 <sup>c,AB</sup> |
| NG     | nd  | nd                         | nd                         | nd                         | nd                          | nd                          |

Figure SI-2m – Isoferulic acid glucuronide.

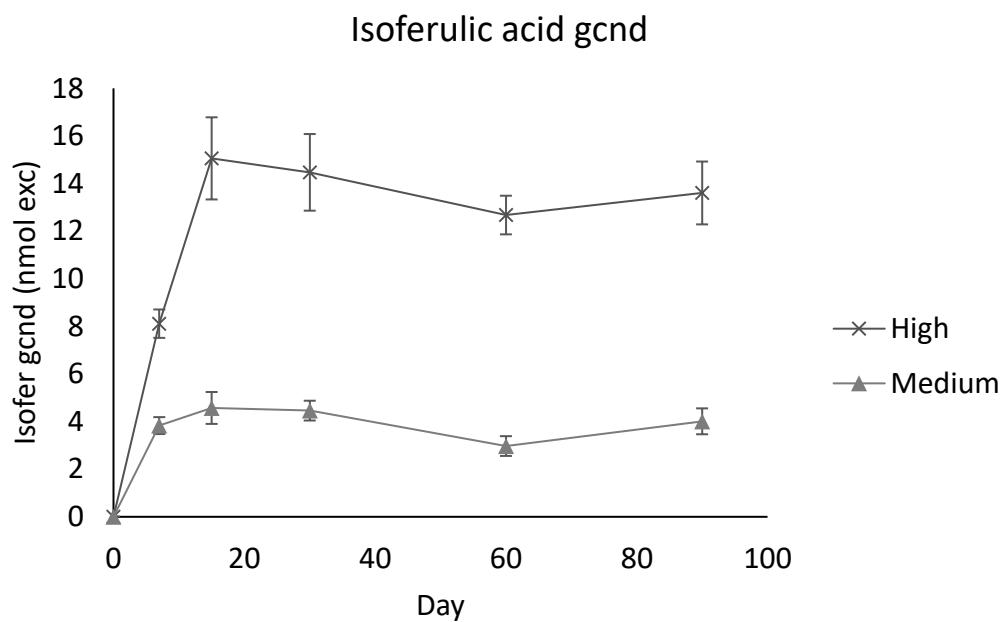

|        | 0  | 7                           | 15                          | Day<br>30                   | 60                          | 90                          |
|--------|----|-----------------------------|-----------------------------|-----------------------------|-----------------------------|-----------------------------|
| Water  | nd | nd                          | nd                          | nd                          | nd                          | nd                          |
| Low    | nd | trace                       | trace                       | trace                       | trace                       | trace                       |
| Medium | nd | 3.83 ± 1.07 <sup>b,AB</sup> | 4.57 ± 1.89 <sup>b,A</sup>  | 4.46 ± 1.25 <sup>b,A</sup>  | 2.97 ± 1.18 <sup>b,B</sup>  | 4.01 ± 1.54 <sup>b,AB</sup> |
| High   | nd | 8.11 ± 1.79 <sup>a,B</sup>  | 15.06 ± 5.18 <sup>a,A</sup> | 14.47 ± 4.83 <sup>a,A</sup> | 12.68 ± 2.57 <sup>a,A</sup> | 13.61 ± 3.73 <sup>a,A</sup> |
| BB     | nd | trace                       | trace                       | trace                       | trace                       | trace                       |
| NG     | nd | nd                          | nd                          | nd                          | nd                          | nd                          |

Figure SI-2n – (Iso)ferulic acid sulfate peak 1.

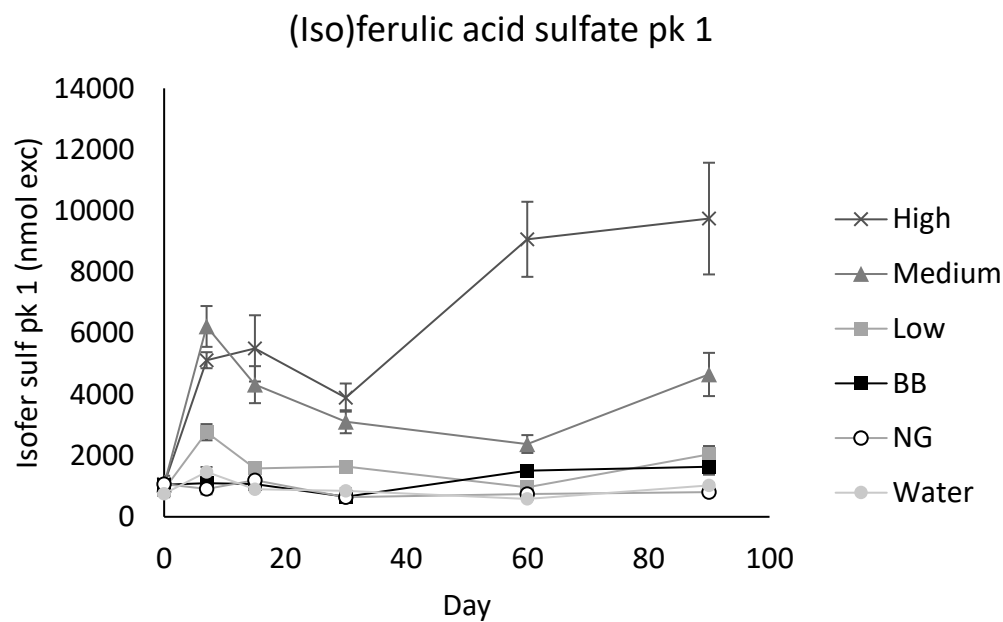

|        | Day                      |                            |                             |                             |                            |                             |
|--------|--------------------------|----------------------------|-----------------------------|-----------------------------|----------------------------|-----------------------------|
|        | 0                        | 7                          | 15                          | 30                          | 60                         | 90                          |
| Water  | 753 ± 355                | 1467 ± 505 <sup>c</sup>    | 902 ± 217 <sup>c</sup>      | 845 ± 265 <sup>c</sup>      | 584 ± 108 <sup>d</sup>     | 1025 ± 212 <sup>d</sup>     |
| Low    | 893 ± 355 <sup>C</sup>   | 2764 ± 839 <sup>b,A</sup>  | 1579 ± 428 <sup>b,B</sup>   | 1641 ± 452 <sup>b,B</sup>   | 960 ± 305 <sup>cd,C</sup>  | 2038 ± 869 <sup>c,AB</sup>  |
| Medium | 1055 ± 387 <sup>D</sup>  | 6220 ± 2000 <sup>a,A</sup> | 4318 ± 1709 <sup>a,AB</sup> | 3106 ± 1126 <sup>a,BC</sup> | 2378 ± 824 <sup>b,C</sup>  | 4650 ± 1997 <sup>b,AB</sup> |
| High   | 1066 ± 260 <sup>C</sup>  | 5117 ± 785 <sup>a,B</sup>  | 5503 ± 3248 <sup>a,B</sup>  | 3896 ± 1380 <sup>a,B</sup>  | 9067 ± 3878 <sup>a,A</sup> | 9744 ± 5162 <sup>a,A</sup>  |
| BB     | 1050 ± 459 <sup>AB</sup> | 1101 ± 204 <sup>c,A</sup>  | 1064 ± 243 <sup>bc,A</sup>  | 656 ± 238 <sup>c,B</sup>    | 1502 ± 124 <sup>bc,A</sup> | 1635 ± 633 <sup>cd,A</sup>  |
| NG     | 1067 ± 549               | 910 ± 347 <sup>c</sup>     | 1196 ± 171 <sup>bc</sup>    | 641 ± 162 <sup>d</sup>      | 740 ± 289 <sup>d</sup>     | 806 ± 151 <sup>d</sup>      |

Figure SI-2o – (Iso)ferulic acid sulfate peak 2.

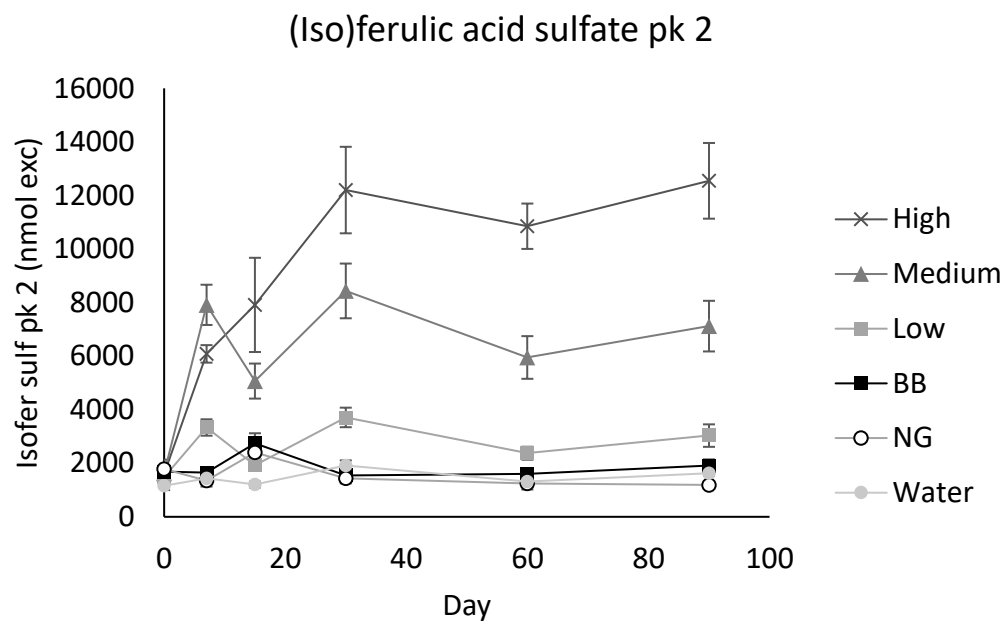

|        | Day                     |                            |                            |                             |                             |                              |
|--------|-------------------------|----------------------------|----------------------------|-----------------------------|-----------------------------|------------------------------|
|        | 0                       | 7                          | 15                         | 30                          | 60                          | 90                           |
| Water  | 1160 ± 512              | 1437 ± 445 <sup>c</sup>    | 1204 ± 342 <sup>c</sup>    | 1916 ± 572 <sup>c</sup>     | 1315 ± 274 <sup>d</sup>     | 1629 ± 306 <sup>d</sup>      |
| Low    | 1479 ± 477 <sup>C</sup> | 3335 ± 968 <sup>b,AB</sup> | 1923 ± 479 <sup>b,C</sup>  | 3711 ± 1154 <sup>b,A</sup>  | 2374 ± 766 <sup>c,BC</sup>  | 3033 ± 1327 <sup>c,ABC</sup> |
| Medium | 1628 ± 415 <sup>C</sup> | 7915 ± 2254 <sup>a,A</sup> | 5068 ± 1850 <sup>a,B</sup> | 8435 ± 3064 <sup>a,A</sup>  | 5949 ± 2253 <sup>b,AB</sup> | 7120 ± 2674 <sup>b,AB</sup>  |
| High   | 1603 ± 388 <sup>C</sup> | 6084 ± 981 <sup>a,B</sup>  | 7913 ± 5277 <sup>a,B</sup> | 12201 ± 4846 <sup>a,A</sup> | 10851 ± 2678 <sup>a,A</sup> | 12546 ± 3997 <sup>a,A</sup>  |
| BB     | 1686 ± 632 <sup>B</sup> | 1650 ± 303 <sup>c,B</sup>  | 2743 ± 1129 <sup>b,A</sup> | 1544 ± 546 <sup>c,B</sup>   | 1607 ± 172 <sup>cd,B</sup>  | 1920 ± 551 <sup>cd,AB</sup>  |
| NG     | 1783 ± 704              | 1354 ± 449 <sup>c</sup>    | 2402 ± 406 <sup>b</sup>    | 1440 ± 381 <sup>c</sup>     | 1244 ± 448 <sup>d</sup>     | 1191 ± 165 <sup>d</sup>      |

Figure SI-2p – Chlorogenic acid.

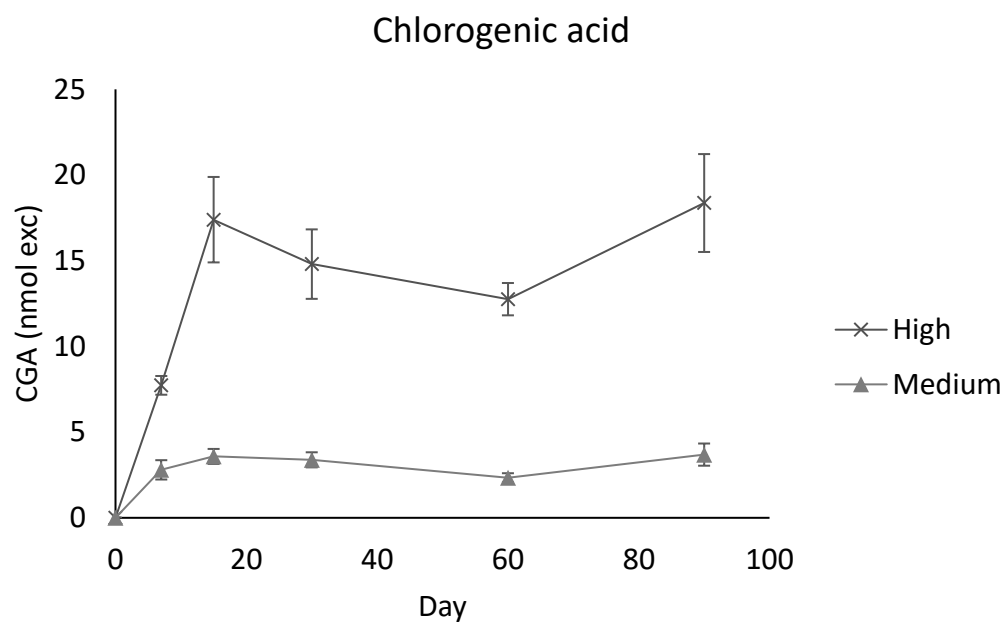

|        | Day |                            |                             |                            |                             |                             |  |
|--------|-----|----------------------------|-----------------------------|----------------------------|-----------------------------|-----------------------------|--|
|        | 0   | 7                          | 15                          | 30                         | 60                          | 90                          |  |
| Water  | nd  | nd                         | nd                          | nd                         | nd                          | nd                          |  |
| Low    | nd  | trace                      | trace                       | trace                      | trace                       | trace                       |  |
| Medium | nd  | 2.8 ± 1.69 <sup>b</sup>    | 3.58 ± 1.24 <sup>b</sup>    | 3.38 ± 1.32 <sup>b</sup>   | 2.34 ± 0.75 <sup>b</sup>    | 3.69 ± 1.83 <sup>b</sup>    |  |
| High   | nd  | 7.73 ± 1.64 <sup>a,B</sup> | 17.39 ± 7.48 <sup>a,A</sup> | 14.8 ± 6.08 <sup>a,A</sup> | 12.76 ± 2.98 <sup>a,A</sup> | 18.37 ± 8.08 <sup>a,A</sup> |  |
| BB     | nd  | trace                      | trace                       | trace                      | trace                       | trace                       |  |
| NG     | nd  | nd                         | nd                          | nd                         | nd                          | nd                          |  |

Figure SI-3a – Cyanidin-3-galactoside.

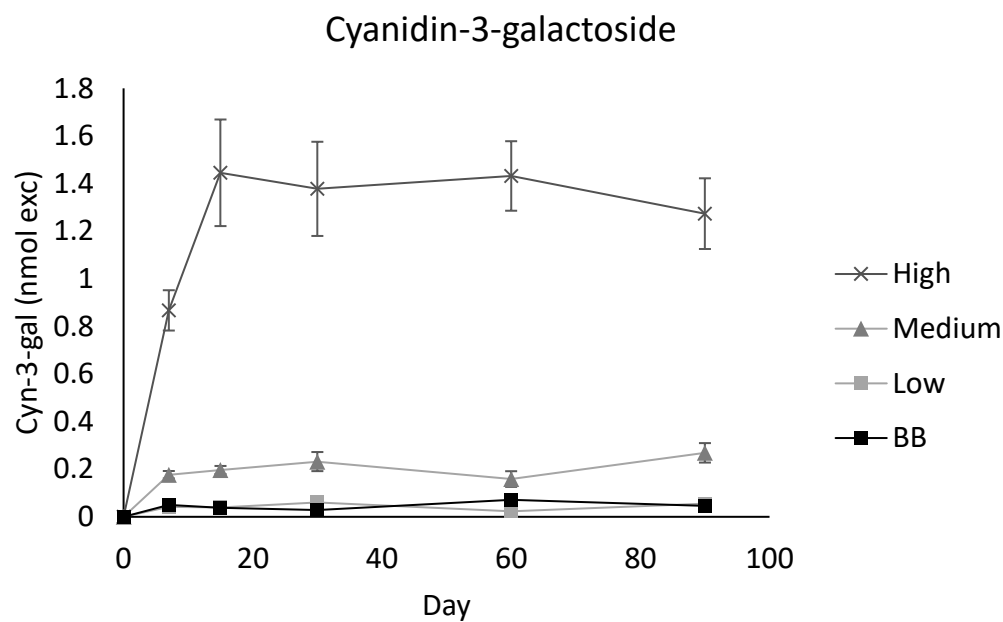

|        | Day |                              |                               |                              |                              |                              |
|--------|-----|------------------------------|-------------------------------|------------------------------|------------------------------|------------------------------|
|        | 0   | 7                            | 15                            | 30                           | 60                           | 90                           |
| Water  | nd  | nd                           | nd                            | nd                           | nd                           | nd                           |
| Low    | nd  | 0.041 ± 0.023 <sup>c,A</sup> | 0.039 ± 0.017 <sup>c,A</sup>  | 0.06 ± 0.032 <sup>c,A</sup>  | 0.023 ± 0.014 <sup>c,B</sup> | 0.056 ± 0.022 <sup>c,A</sup> |
| Medium | nd  | 0.177 ± 0.047 <sup>b</sup>   | 0.197 ± 0.048 <sup>b</sup>    | 0.232 ± 0.12 <sup>b</sup>    | 0.159 ± 0.093 <sup>b</sup>   | 0.269 ± 0.116 <sup>b</sup>   |
| High   | nd  | 0.867 ± 0.254 <sup>a</sup>   | 1.445 ± 0.672 <sup>a</sup>    | 1.378 ± 0.594 <sup>a</sup>   | 1.432 ± 0.462 <sup>a</sup>   | 1.274 ± 0.42 <sup>a</sup>    |
| BB     | nd  | 0.05 ± 0.02 <sup>c,A</sup>   | 0.038 ± 0.017 <sup>c,AB</sup> | 0.028 ± 0.017 <sup>d,B</sup> | 0.071 ± 0.035 <sup>b,A</sup> | 0.045 ± 0.035 <sup>c,A</sup> |
| NG     | nd  | nd                           | nd                            | nd                           | nd                           | nd                           |



Figure SI-3b – Cyanidin-3-glucoside.

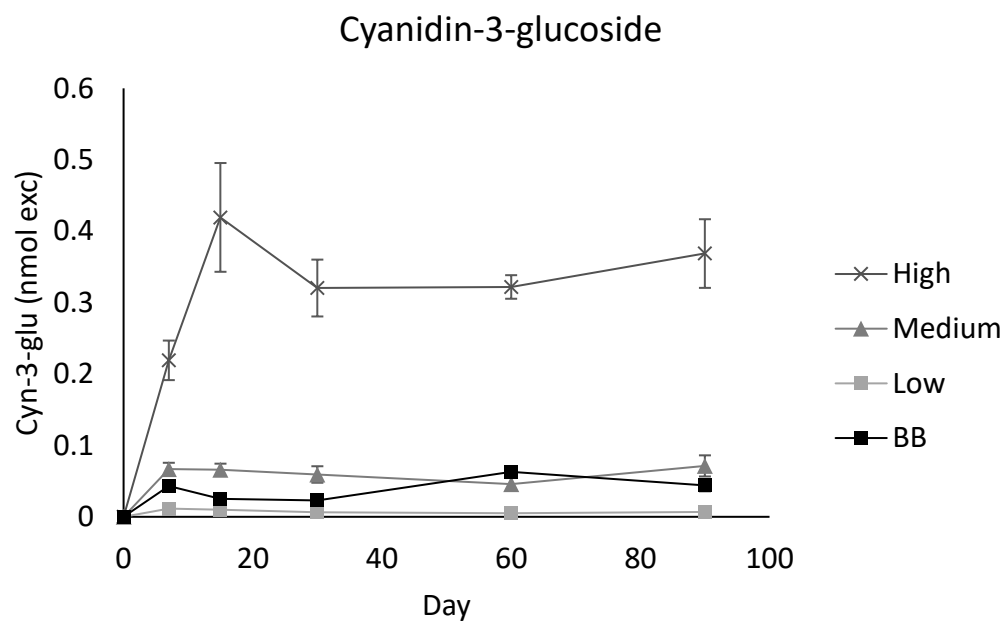

|        | Day |                              |                               |                               |                              |                               |
|--------|-----|------------------------------|-------------------------------|-------------------------------|------------------------------|-------------------------------|
|        | 0   | 7                            | 15                            | 30                            | 60                           | 90                            |
| Water  | nd  | nd                           | nd                            | nd                            | nd                           | nd                            |
| Low    | nd  | 0.012 ± 0.006 <sup>c,A</sup> | 0.01 ± 0.005 <sup>d,AB</sup>  | 0.007 ± 0.001 <sup>d,AB</sup> | 0.005 ± 0.003 <sup>c,B</sup> | 0.007 ± 0.005 <sup>c,AB</sup> |
| Medium | nd  | 0.067 ± 0.026 <sup>b</sup>   | 0.066 ± 0.024 <sup>b</sup>    | 0.059 ± 0.035 <sup>b</sup>    | 0.046 ± 0.024 <sup>b</sup>   | 0.071 ± 0.042 <sup>b</sup>    |
| High   | nd  | 0.219 ± 0.083 <sup>a</sup>   | 0.419 ± 0.228 <sup>a</sup>    | 0.32 ± 0.119 <sup>a</sup>     | 0.322 ± 0.052 <sup>a</sup>   | 0.369 ± 0.136 <sup>a</sup>    |
| BB     | nd  | 0.043 ± 0.019 <sup>b,A</sup> | 0.025 ± 0.011 <sup>c,AB</sup> | 0.023 ± 0.014 <sup>c,B</sup>  | 0.063 ± 0.012 <sup>b,A</sup> | 0.044 ± 0.021 <sup>b,A</sup>  |
| NG     | nd  | nd                           | nd                            | nd                            | nd                           | nd                            |

Figure SI-3c – Delphinidin-3-glycosides.

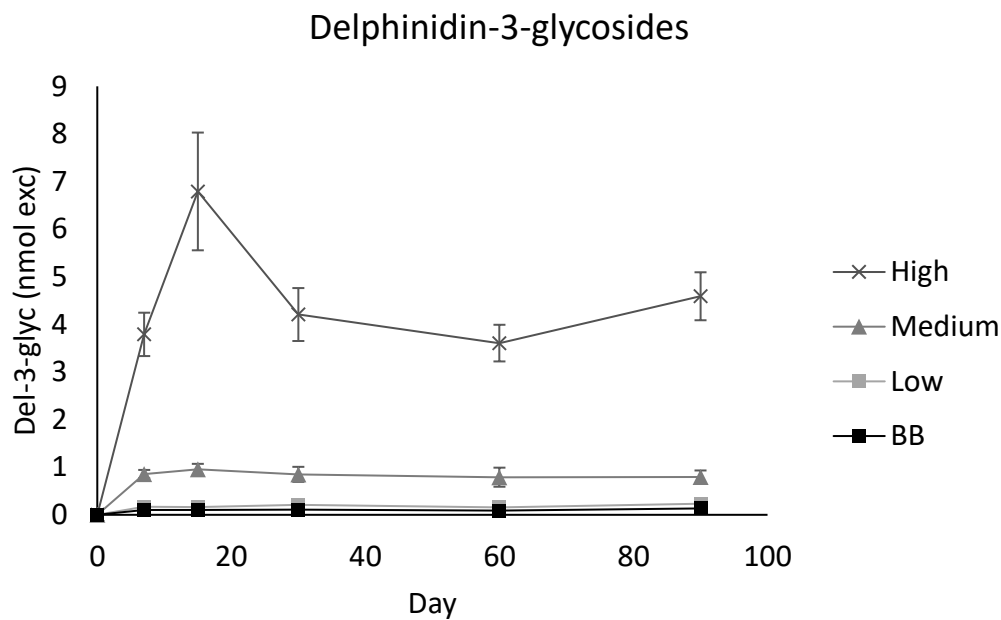

|        | Day |                          |                          |                          |                          |                          |
|--------|-----|--------------------------|--------------------------|--------------------------|--------------------------|--------------------------|
|        | 0   | 7                        | 15                       | 30                       | 60                       | 90                       |
| Water  | nd  | nd                       | nd                       | nd                       | nd                       | nd                       |
| Low    | nd  | 0.17 ± 0.09 <sup>c</sup> | 0.16 ± 0.08 <sup>c</sup> | 0.21 ± 0.12 <sup>c</sup> | 0.16 ± 0.06 <sup>c</sup> | 0.23 ± 0.1 <sup>c</sup>  |
| Medium | nd  | 0.86 ± 0.26 <sup>b</sup> | 0.96 ± 0.32 <sup>b</sup> | 0.85 ± 0.47 <sup>b</sup> | 0.79 ± 0.57 <sup>b</sup> | 0.8 ± 0.38 <sup>b</sup>  |
| High   | nd  | 3.79 ± 1.37 <sup>a</sup> | 6.79 ± 3.71 <sup>a</sup> | 4.21 ± 1.67 <sup>a</sup> | 3.61 ± 1.22 <sup>a</sup> | 4.59 ± 1.43 <sup>a</sup> |
| BB     | nd  | 0.1 ± 0.05 <sup>c</sup>  | 0.1 ± 0.08 <sup>c</sup>  | 0.11 ± 0.04 <sup>c</sup> | 0.09 ± 0.04 <sup>c</sup> | 0.13 ± 0.08 <sup>c</sup> |
| NG     | nd  | nd                       | nd                       | nd                       | nd                       | nd                       |

Figure SI-3d – Delphinidin-3-glucuronide.

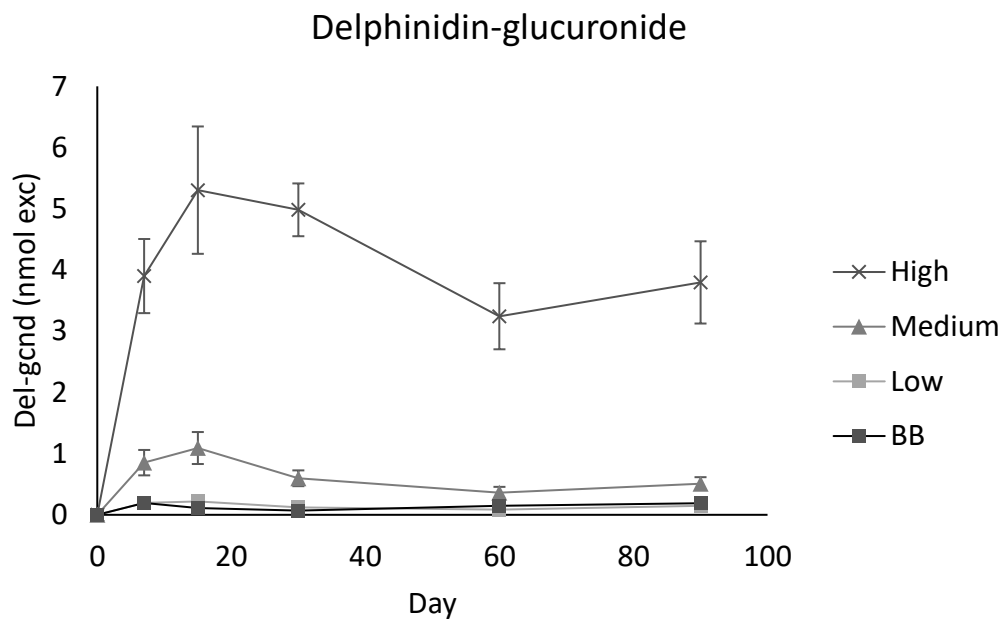

|        | Day |                             |                            |                            |                            |                            |
|--------|-----|-----------------------------|----------------------------|----------------------------|----------------------------|----------------------------|
|        | 0   | 7                           | 15                         | 30                         | 60                         | 90                         |
| Water  | nd  | nd                          | nd                         | nd                         | nd                         | nd                         |
| Low    | nd  | 0.19 ± 0.14 <sup>c</sup>    | 0.22 ± 0.13 <sup>c</sup>   | 0.12 ± 0.09 <sup>c</sup>   | 0.08 ± 0.06 <sup>c</sup>   | 0.15 ± 0.1 <sup>c</sup>    |
| Medium | nd  | 0.85 ± 0.62 <sup>b,AB</sup> | 1.09 ± 0.74 <sup>b,A</sup> | 0.6 ± 0.39 <sup>b,AB</sup> | 0.36 ± 0.27 <sup>b,B</sup> | 0.51 ± 0.3 <sup>b,AB</sup> |
| High   | nd  | 3.9 ± 1.82 <sup>a</sup>     | 5.3 ± 3.12 <sup>a</sup>    | 4.98 ± 1.29 <sup>a</sup>   | 3.24 ± 1.71 <sup>a</sup>   | 3.8 ± 1.9 <sup>a</sup>     |
| BB     | nd  | 0.19 ± 0.06 <sup>c</sup>    | 0.11 ± 0.09 <sup>c</sup>   | 0.07 ± 0.04 <sup>c</sup>   | 0.15 ± 0.1 <sup>bc</sup>   | 0.19 ± 0.12 <sup>bc</sup>  |
| NG     | nd  | nd                          | nd                         | nd                         | nd                         | nd                         |

Figure SI-3e – Malvidin-3-galactoside.

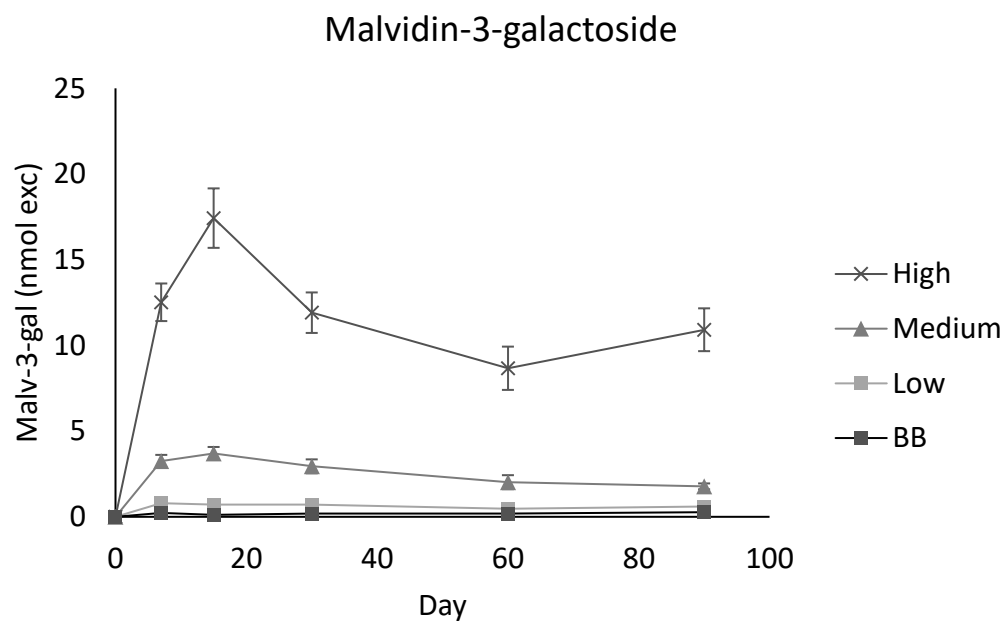

|        | Day |                              |                            |                              |                            |                              |
|--------|-----|------------------------------|----------------------------|------------------------------|----------------------------|------------------------------|
|        | 0   | 7                            | 15                         | 30                           | 60                         | 90                           |
| Water  | nd  | nd                           | nd                         | nd                           | nd                         | nd                           |
| Low    | nd  | 0.79 ± 0.36 <sup>c,A</sup>   | 0.7 ± 0.3 <sup>c,AB</sup>  | 0.72 ± 0.52 <sup>c,AB</sup>  | 0.47 ± 0.25 <sup>c,B</sup> | 0.61 ± 0.34 <sup>c,AB</sup>  |
| Medium | nd  | 3.25 ± 1.08 <sup>b,AB</sup>  | 3.7 ± 1.07 <sup>b,A</sup>  | 2.95 ± 1.22 <sup>b,AB</sup>  | 2.02 ± 1.15 <sup>b,B</sup> | 1.78 ± 0.48 <sup>b,B</sup>   |
| High   | nd  | 12.52 ± 3.29 <sup>a,AB</sup> | 17.43 ± 5.2 <sup>a,A</sup> | 11.91 ± 3.55 <sup>a,AB</sup> | 8.67 ± 3.99 <sup>a,B</sup> | 10.91 ± 3.53 <sup>a,AB</sup> |
| BB     | nd  | 0.23 ± 0.1 <sup>d,A</sup>    | 0.12 ± 0.05 <sup>d,B</sup> | 0.19 ± 0.09 <sup>d,AB</sup>  | 0.2 ± 0.09 <sup>d,AB</sup> | 0.27 ± 0.12 <sup>d,A</sup>   |
| NG     | nd  | nd                           | nd                         | nd                           | nd                         | nd                           |

Figure SI-3f – Malvidin-3-glucoside.

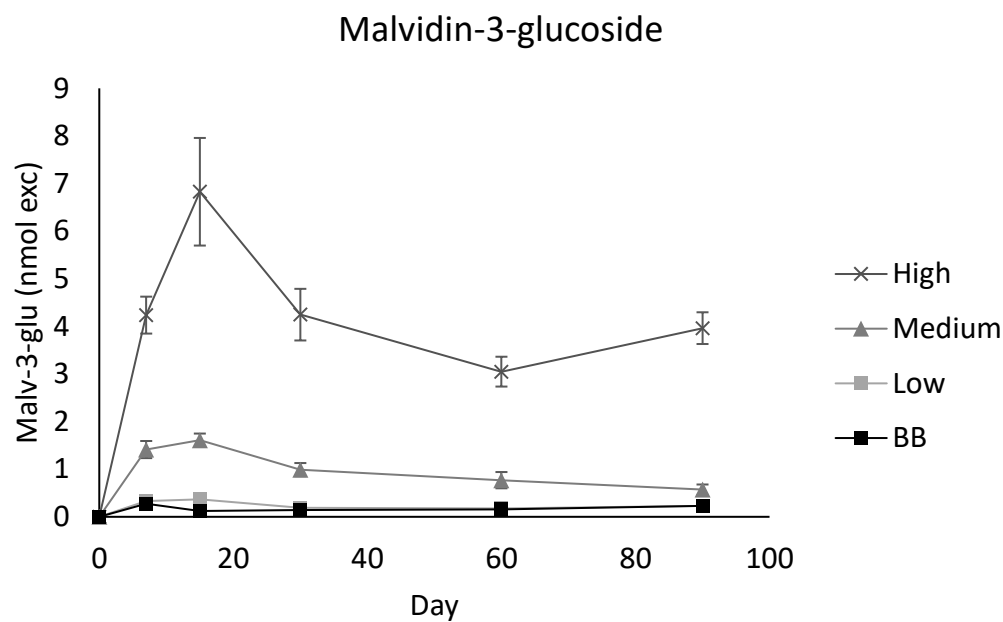

|        | Day |                             |                            |                             |                             |                             |
|--------|-----|-----------------------------|----------------------------|-----------------------------|-----------------------------|-----------------------------|
|        | 0   | 7                           | 15                         | 30                          | 60                          | 90                          |
| Water  | nd  | nd                          | nd                         | nd                          | nd                          | nd                          |
| Low    | nd  | 0.33 ± 0.15 <sup>c,AB</sup> | 0.37 ± 0.2 <sup>c,A</sup>  | 0.19 ± 0.14 <sup>c,C</sup>  | 0.18 ± 0.1 <sup>c,C</sup>   | 0.23 ± 0.15 <sup>c,BC</sup> |
| Medium | nd  | 1.41 ± 0.54 <sup>b,AB</sup> | 1.61 ± 0.39 <sup>b,A</sup> | 0.99 ± 0.41 <sup>b,BC</sup> | 0.77 ± 0.48 <sup>b,C</sup>  | 0.57 ± 0.31 <sup>b,C</sup>  |
| High   | nd  | 4.24 ± 1.16 <sup>a,AB</sup> | 6.83 ± 3.39 <sup>a,A</sup> | 4.25 ± 1.63 <sup>a,AB</sup> | 3.05 ± 0.99 <sup>a,B</sup>  | 3.96 ± 0.94 <sup>a,AB</sup> |
| BB     | nd  | 0.27 ± 0.13 <sup>c,A</sup>  | 0.12 ± 0.04 <sup>d,B</sup> | 0.14 ± 0.07 <sup>c,B</sup>  | 0.16 ± 0.06 <sup>c,AB</sup> | 0.23 ± 0.1 <sup>c,A</sup>   |
| NG     | nd  | nd                          | nd                         | nd                          | nd                          | nd                          |

Figure SI-3g – Peonidin-3-galactoside.

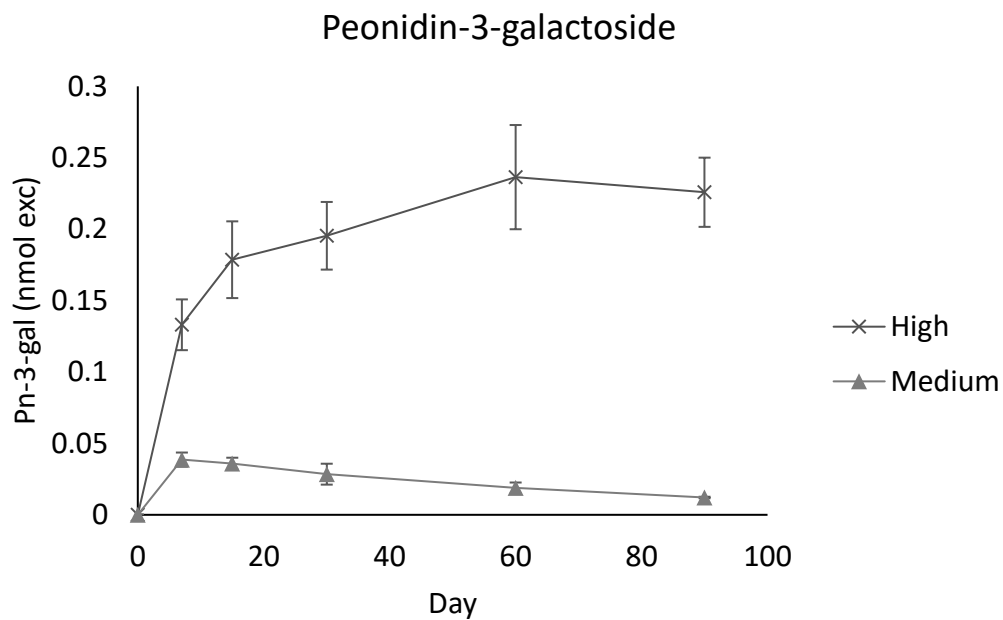

|        | Day |                         |                          |                          |                         |                         |
|--------|-----|-------------------------|--------------------------|--------------------------|-------------------------|-------------------------|
|        | 0   | 7                       | 15                       | 30                       | 60                      | 90                      |
| Water  | nd  | nd                      | nd                       | nd                       | nd                      | nd                      |
| Low    | nd  | trace                   | trace                    | trace                    | trace                   | trace                   |
| Medium | nd  | $0.039 \pm 0.015^{b,A}$ | $0.036 \pm 0.011^{b,AB}$ | $0.028 \pm 0.022^{b,BC}$ | $0.019 \pm 0.011^{b,C}$ | $0.012 \pm 0.001^{b,C}$ |
| High   | nd  | $0.133 \pm 0.053^a$     | $0.179 \pm 0.081^a$      | $0.195 \pm 0.071^a$      | $0.236 \pm 0.115^a$     | $0.226 \pm 0.069^a$     |
| BB     | nd  | trace                   | trace                    | trace                    | trace                   | trace                   |
| NG     | nd  | nd                      | nd                       | nd                       | nd                      | nd                      |

Figure SI-3h – Peonidin-3-glucoside.

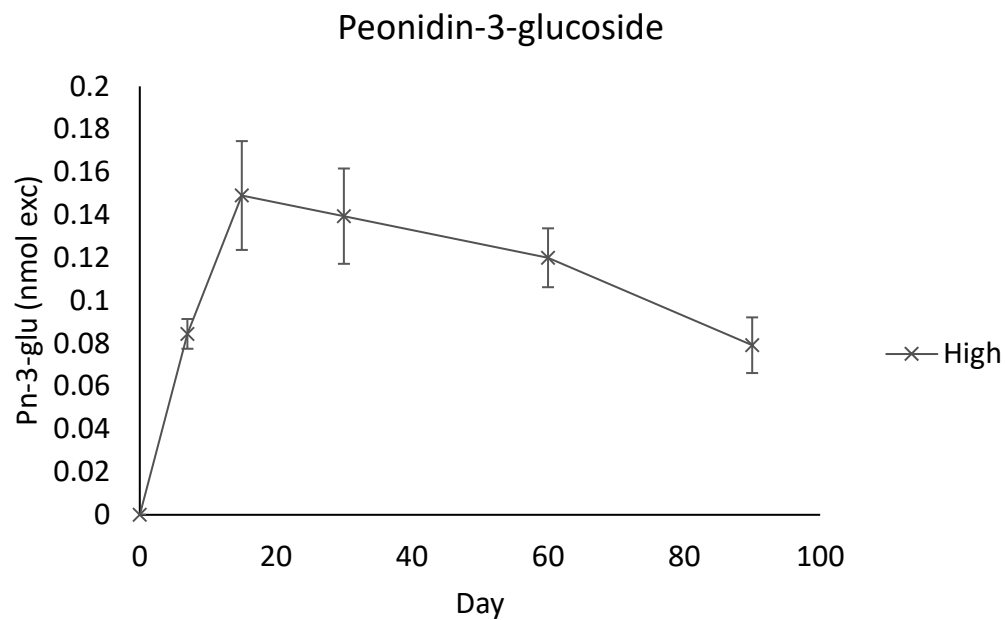

|        | Day |                             |                            |                             |                             |                            |       |
|--------|-----|-----------------------------|----------------------------|-----------------------------|-----------------------------|----------------------------|-------|
|        | 0   | 7                           | 15                         | 30                          | 60                          | 90                         |       |
| Water  | nd  | nd                          | nd                         | nd                          | nd                          | nd                         | nd    |
| Low    | nd  | trace                       | trace                      | trace                       | trace                       | trace                      | trace |
| Medium | nd  | trace                       | trace                      | trace                       | trace                       | trace                      | trace |
| High   | nd  | 0.084 ± 0.021 <sup>BC</sup> | 0.149 ± 0.076 <sup>A</sup> | 0.139 ± 0.067 <sup>AB</sup> | 0.12 ± 0.043 <sup>ABC</sup> | 0.079 ± 0.037 <sup>C</sup> |       |
| BB     | nd  | trace                       | trace                      | trace                       | trace                       | trace                      | trace |
| NG     | nd  | nd                          | nd                         | nd                          | nd                          | nd                         | nd    |

Figure SI-3i – Petunidin-3-galactoside.

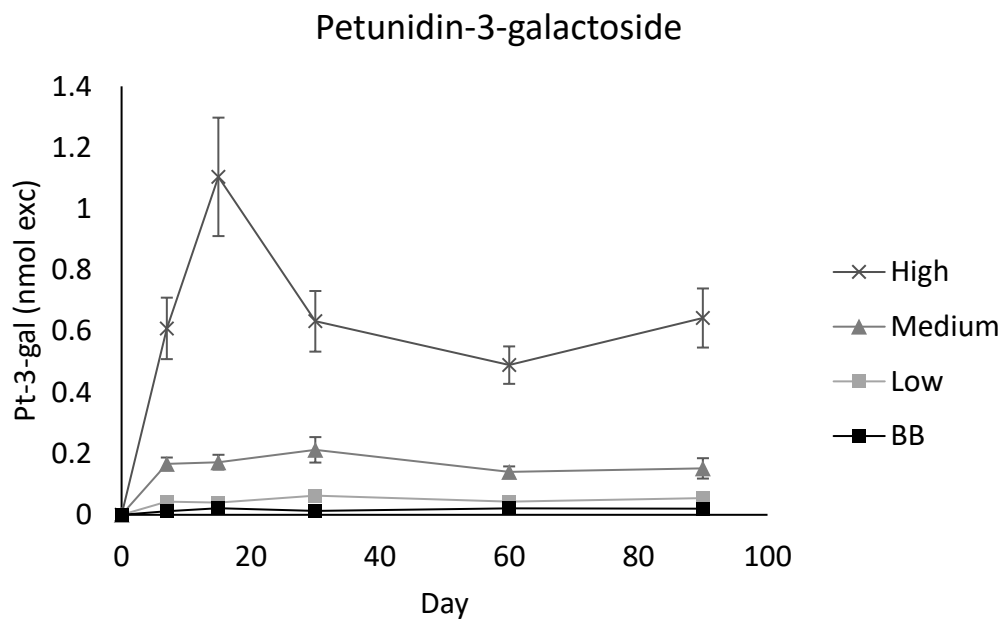

|        | Day |                               |                              |                               |                              |                               |
|--------|-----|-------------------------------|------------------------------|-------------------------------|------------------------------|-------------------------------|
|        | 0   | 7                             | 15                           | 30                            | 60                           | 90                            |
| Water  | nd  | nd                            | nd                           | nd                            | nd                           | nd                            |
| Low    | nd  | 0.043 ± 0.028 <sup>c</sup>    | 0.04 ± 0.02 <sup>c</sup>     | 0.063 ± 0.049 <sup>c</sup>    | 0.043 ± 0.024 <sup>c</sup>   | 0.054 ± 0.026 <sup>c</sup>    |
| Medium | nd  | 0.167 ± 0.061 <sup>b</sup>    | 0.172 ± 0.068 <sup>b</sup>   | 0.212 ± 0.125 <sup>b</sup>    | 0.14 ± 0.051 <sup>b</sup>    | 0.152 ± 0.094 <sup>b</sup>    |
| High   | nd  | 0.609 ± 0.301 <sup>a,AB</sup> | 1.104 ± 0.581 <sup>a,A</sup> | 0.632 ± 0.297 <sup>a,AB</sup> | 0.489 ± 0.193 <sup>a,B</sup> | 0.643 ± 0.273 <sup>a,AB</sup> |
| BB     | nd  | 0.012 ± 0.006 <sup>d</sup>    | 0.022 ± 0.01 <sup>c</sup>    | 0.013 ± 0.008 <sup>d</sup>    | 0.021 ± 0.012 <sup>c</sup>   | 0.02 ± 0.007 <sup>c</sup>     |
| NG     | nd  | nd                            | nd                           | nd                            | nd                           | nd                            |



Figure SI-3j – Petunidin-3-glucoside.

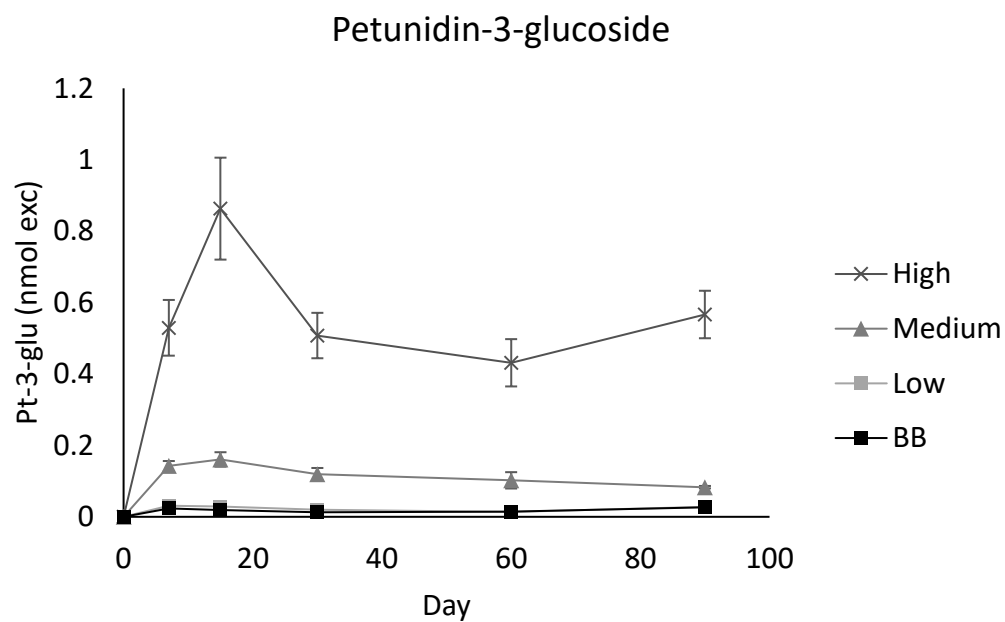

|        | Day |                              |                               |                               |                               |                               |
|--------|-----|------------------------------|-------------------------------|-------------------------------|-------------------------------|-------------------------------|
|        | 0   | 7                            | 15                            | 30                            | 60                            | 90                            |
| Water  | nd  | nd                           | nd                            | nd                            | nd                            | nd                            |
| Low    | nd  | 0.031 ± 0.02 <sup>c,A</sup>  | 0.029 ± 0.015 <sup>c,A</sup>  | 0.019 ± 0.013 <sup>c,AB</sup> | 0.014 ± 0.011 <sup>c,B</sup>  | 0.028 ± 0.016 <sup>c,AB</sup> |
| Medium | nd  | 0.142 ± 0.042 <sup>b</sup>   | 0.161 ± 0.057 <sup>b</sup>    | 0.12 ± 0.052 <sup>b</sup>     | 0.102 ± 0.065 <sup>b</sup>    | 0.083 ± 0.01 <sup>b</sup>     |
| High   | nd  | 0.529 ± 0.234 <sup>a</sup>   | 0.863 ± 0.428 <sup>a</sup>    | 0.508 ± 0.191 <sup>a</sup>    | 0.431 ± 0.209 <sup>a</sup>    | 0.567 ± 0.188 <sup>a</sup>    |
| BB     | nd  | 0.024 ± 0.011 <sup>c,A</sup> | 0.019 ± 0.013 <sup>c,AB</sup> | 0.012 ± 0.006 <sup>c,B</sup>  | 0.014 ± 0.005 <sup>c,AB</sup> | 0.027 ± 0.019 <sup>c,AB</sup> |
| NG     | nd  | nd                           | nd                            | nd                            | nd                            | nd                            |

Figure SI-3k – Petunidin-3-glucuronide.

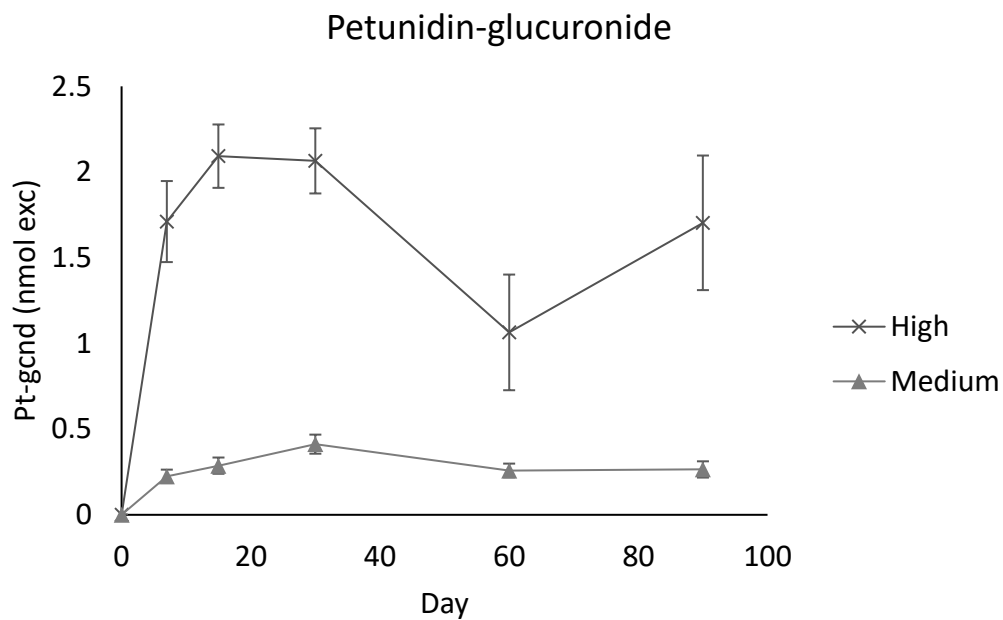

|        | Day |                            |                            |                            |                            |                            |  |
|--------|-----|----------------------------|----------------------------|----------------------------|----------------------------|----------------------------|--|
|        | 0   | 7                          | 15                         | 30                         | 60                         | 90                         |  |
| Water  | nd  | nd                         | nd                         | nd                         | nd                         | nd                         |  |
| Low    | nd  | trace                      | trace                      | trace                      | trace                      | trace                      |  |
| Medium | nd  | 0.22 ± 0.12 <sup>b</sup>   | 0.29 ± 0.13 <sup>b</sup>   | 0.41 ± 0.17 <sup>b</sup>   | 0.26 ± 0.11 <sup>b</sup>   | 0.26 ± 0.13 <sup>b</sup>   |  |
| High   | nd  | 1.71 ± 0.71 <sup>a,A</sup> | 2.09 ± 0.55 <sup>a,A</sup> | 2.06 ± 0.57 <sup>a,A</sup> | 1.06 ± 1.07 <sup>a,B</sup> | 1.7 ± 1.11 <sup>a,AB</sup> |  |
| BB     | nd  | trace                      | trace                      | trace                      | trace                      | trace                      |  |
| NG     | nd  | nd                         | nd                         | nd                         | nd                         | nd                         |  |

Figure SI-31 – Quercetin.

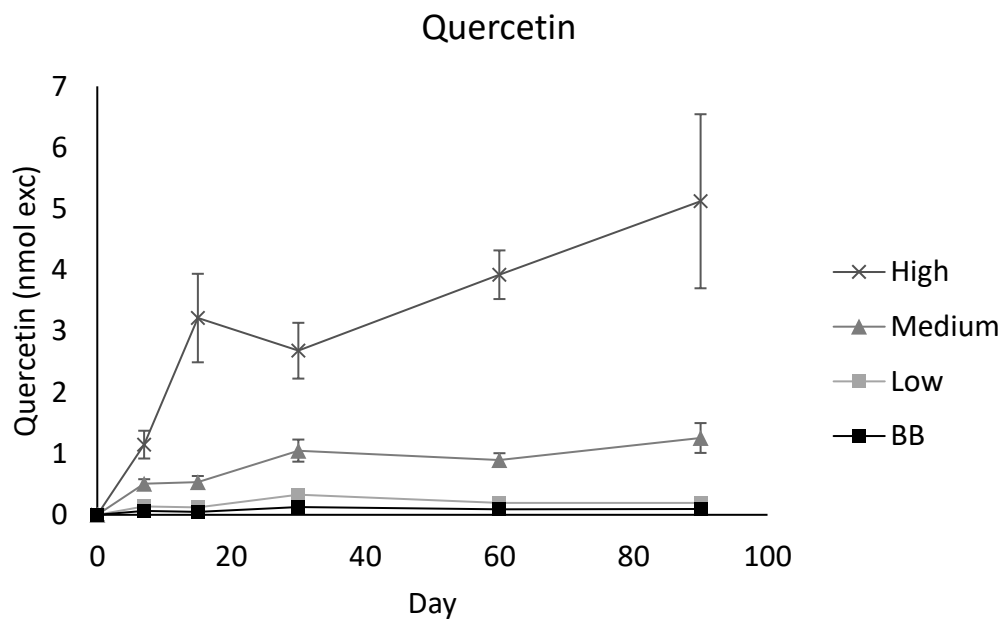

|        | Day |                            |                            |                            |                             |                             |
|--------|-----|----------------------------|----------------------------|----------------------------|-----------------------------|-----------------------------|
|        | 0   | 7                          | 15                         | 30                         | 60                          | 90                          |
| Water  | nd  | nd                         | nd                         | nd                         | nd                          | nd                          |
| Low    | nd  | 0.14 ± 0.09 <sup>b,B</sup> | 0.12 ± 0.08 <sup>c,B</sup> | 0.33 ± 0.19 <sup>b,A</sup> | 0.20 ± 0.10 <sup>c,AB</sup> | 0.20 ± 0.04 <sup>b,AB</sup> |
| Medium | nd  | 0.51 ± 0.22 <sup>a</sup>   | 0.53 ± 0.28 <sup>b</sup>   | 1.05 ± 0.54 <sup>a</sup>   | 0.9 ± 0.31 <sup>b</sup>     | 1.26 ± 0.69 <sup>a</sup>    |
| High   | nd  | 1.15 ± 0.68 <sup>a,B</sup> | 3.21 ± 2.17 <sup>a,A</sup> | 2.68 ± 1.37 <sup>a,A</sup> | 3.92 ± 1.26 <sup>a,A</sup>  | 5.12 ± 4.02 <sup>a,A</sup>  |
| BB     | nd  | 0.06 ± 0.04 <sup>b</sup>   | 0.05 ± 0.05 <sup>c</sup>   | 0.13 ± 0.05 <sup>b</sup>   | 0.09 ± 0.11 <sup>c</sup>    | 0.1 ± 0.04 <sup>b</sup>     |
| NG     | nd  | nd                         | nd                         | nd                         | nd                          | nd                          |

Figure SI-3m – 4-methoxy-queracetin.

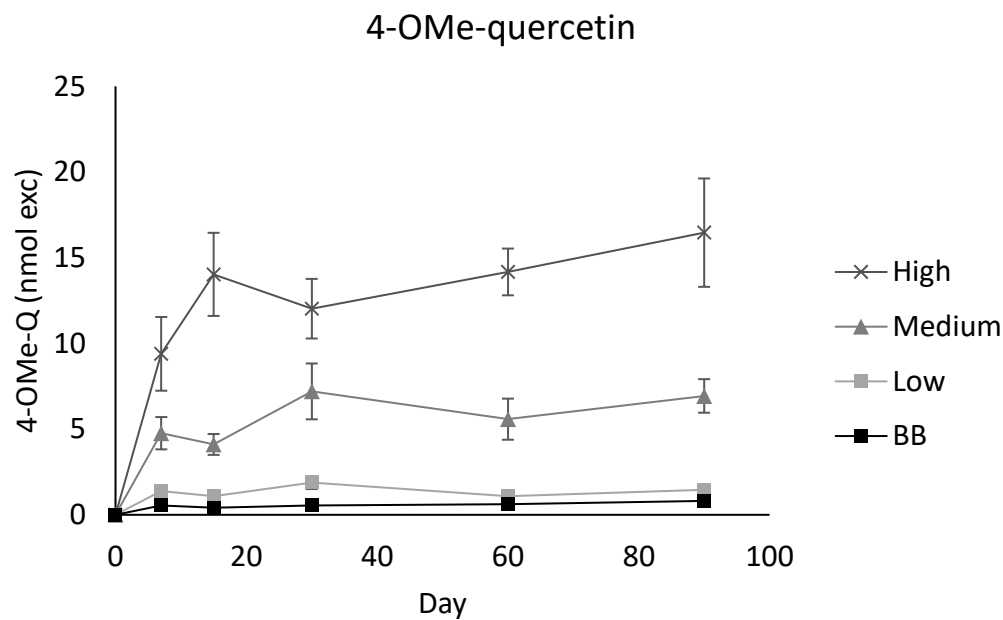

|        | Day |                             |                              |                              |                             |                              |
|--------|-----|-----------------------------|------------------------------|------------------------------|-----------------------------|------------------------------|
|        | 0   | 7                           | 15                           | 30                           | 60                          | 90                           |
| Water  | nd  | nd                          | nd                           | nd                           | nd                          | nd                           |
| Low    | nd  | 1.39 ± 0.77 <sup>b</sup>    | 1.09 ± 0.63 <sup>c</sup>     | 1.88 ± 1.19 <sup>b</sup>     | 1.08 ± 0.65 <sup>b</sup>    | 1.46 ± 0.33 <sup>b</sup>     |
| Medium | nd  | 4.76 ± 2.83 <sup>a</sup>    | 4.11 ± 1.72 <sup>b</sup>     | 7.2 ± 4.89 <sup>a</sup>      | 5.58 ± 3.39 <sup>a</sup>    | 6.94 ± 2.77 <sup>a</sup>     |
| High   | nd  | 9.39 ± 6.45 <sup>a,B</sup>  | 14.03 ± 7.27 <sup>a,AB</sup> | 12.03 ± 5.22 <sup>a,AB</sup> | 14.17 ± 4.31 <sup>a,A</sup> | 16.46 ± 8.94 <sup>a,AB</sup> |
| BB     | nd  | 0.54 ± 0.26 <sup>c,AB</sup> | 0.42 ± 0.26 <sup>d,B</sup>   | 0.54 ± 0.14 <sup>c,AB</sup>  | 0.62 ± 0.26 <sup>b,AB</sup> | 0.81 ± 0.62 <sup>b,A</sup>   |
| NG     | nd  | nd                          | nd                           | nd                           | nd                          | nd                           |

Figure SI-3n – Quercetin glucuronide peak 1.

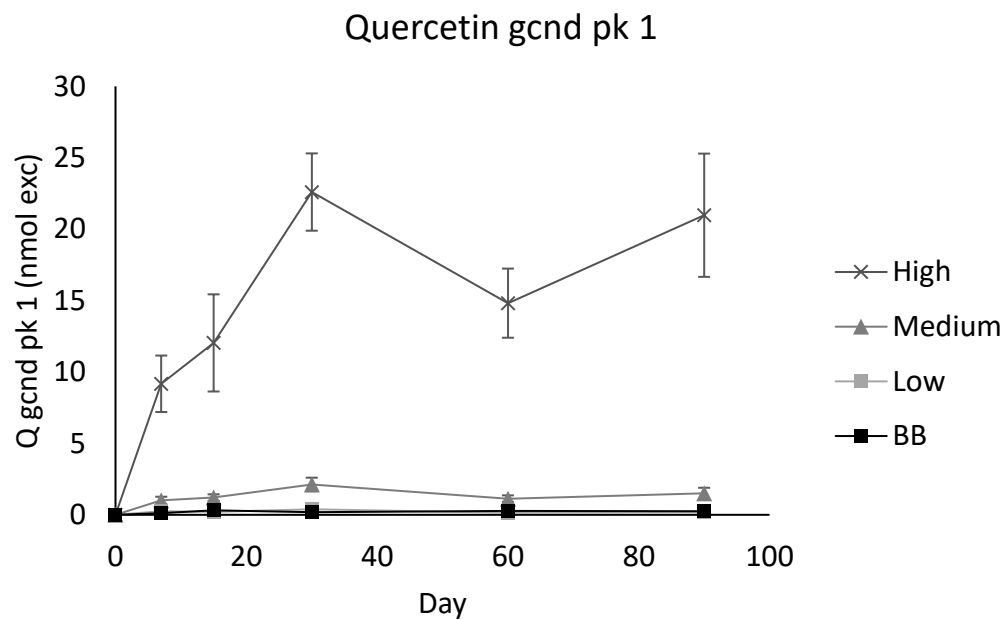

|        | Day |                            |                               |                             |                              |                              |
|--------|-----|----------------------------|-------------------------------|-----------------------------|------------------------------|------------------------------|
|        | 0   | 7                          | 15                            | 30                          | 60                           | 90                           |
| Water  | nd  | nd                         | nd                            | nd                          | nd                           | nd                           |
| Low    | nd  | 0.26 ± 0.19 <sup>c</sup>   | 0.21 ± 0.17 <sup>c</sup>      | 0.39 ± 0.35 <sup>c</sup>    | 0.13 ± 0.07 <sup>c</sup>     | 0.19 ± 0.14 <sup>c</sup>     |
| Medium | nd  | 1.01 ± 0.78 <sup>b,B</sup> | 1.21 ± 0.65 <sup>b,AB</sup>   | 2.12 ± 1.43 <sup>b,A</sup>  | 1.13 ± 0.65 <sup>b,AB</sup>  | 1.52 ± 1.08 <sup>b,AB</sup>  |
| High   | nd  | 9.17 ± 5.93 <sup>a,B</sup> | 12.03 ± 10.21 <sup>a,AB</sup> | 22.6 ± 8.12 <sup>a,A</sup>  | 14.82 ± 7.65 <sup>a,AB</sup> | 20.98 ± 12.2 <sup>a,AB</sup> |
| BB     | nd  | 0.11 ± 0.08 <sup>d,B</sup> | 0.31 ± 0.27 <sup>c,A</sup>    | 0.18 ± 0.12 <sup>c,AB</sup> | 0.26 ± 0.22 <sup>c,A</sup>   | 0.26 ± 0.14 <sup>c,AB</sup>  |
| NG     | nd  | nd                         | nd                            | nd                          | nd                           | nd                           |

Figure SI-3o – Quercetin glucuronide peak 2.

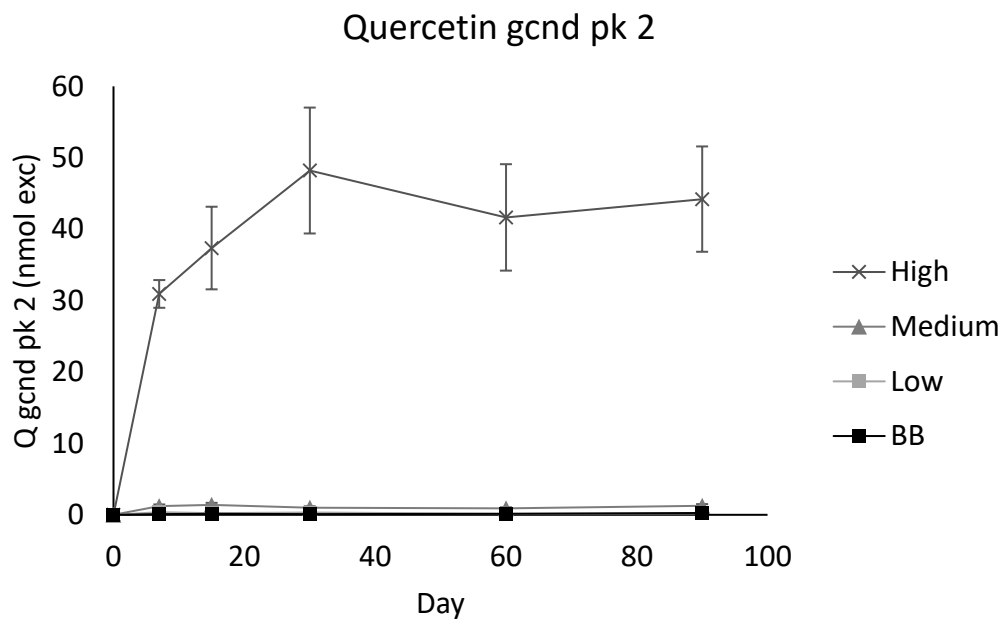

|        | Day |                            |                             |                            |                             |                            |
|--------|-----|----------------------------|-----------------------------|----------------------------|-----------------------------|----------------------------|
|        | 0   | 7                          | 15                          | 30                         | 60                          | 90                         |
| Water  | nd  | nd                         | nd                          | nd                         | nd                          | nd                         |
| Low    | nd  | 0.36 ± 0.10 <sup>c,A</sup> | 0.24 ± 0.15 <sup>c,AB</sup> | 0.3 ± 0.17 <sup>c,AB</sup> | 0.13 ± 0.09 <sup>c,C</sup>  | 0.21 ± 0.09 <sup>c,B</sup> |
| Medium | nd  | 1.23 ± 0.67 <sup>b</sup>   | 1.39 ± 0.81 <sup>b</sup>    | 1.0 ± 0.56 <sup>b</sup>    | 0.89 ± 0.45 <sup>b</sup>    | 1.24 ± 0.72 <sup>b</sup>   |
| High   | nd  | 30.93 ± 5.82 <sup>a</sup>  | 37.36 ± 17.35 <sup>a</sup>  | 48.21 ± 26.44 <sup>a</sup> | 41.64 ± 23.56 <sup>a</sup>  | 44.21 ± 20.86 <sup>a</sup> |
| BB     | nd  | 0.11 ± 0.09 <sup>d,B</sup> | 0.15 ± 0.1 <sup>c,AB</sup>  | 0.11 ± 0.05 <sup>d,B</sup> | 0.16 ± 0.07 <sup>c,AB</sup> | 0.26 ± 0.12 <sup>c,A</sup> |
| NG     | nd  | nd                         | nd                          | nd                         | nd                          | nd                         |

Figure SI-3p – Quercetin glucuronide peak 3.

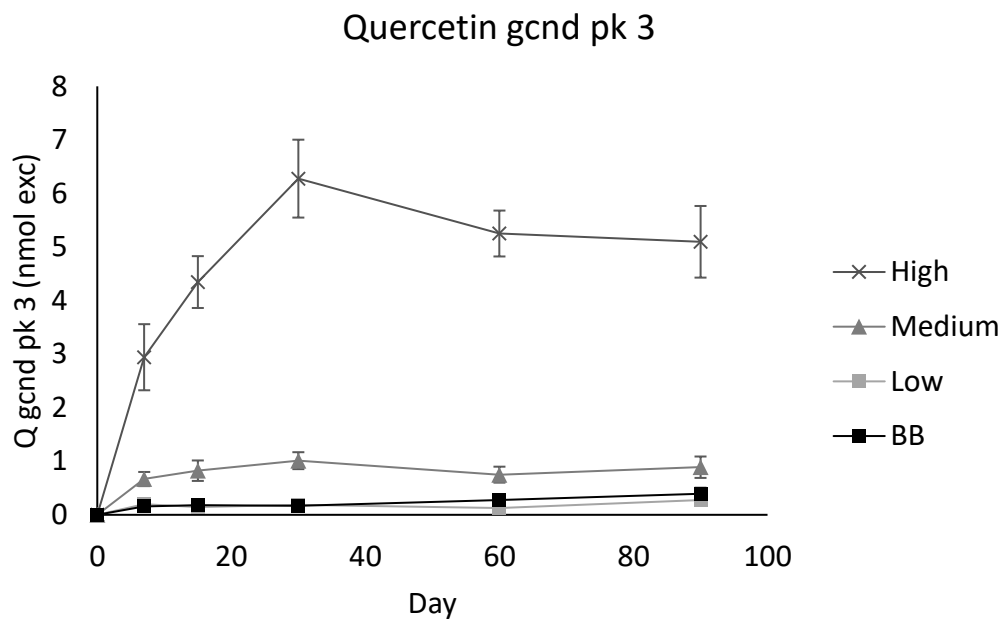

|        | Day |                          |                          |                          |                           |                           |
|--------|-----|--------------------------|--------------------------|--------------------------|---------------------------|---------------------------|
|        | 0   | 7                        | 15                       | 30                       | 60                        | 90                        |
| Water  | nd  | nd                       | nd                       | nd                       | nd                        | nd                        |
| Low    | nd  | 0.2 ± 0.15 <sup>c</sup>  | 0.14 ± 0.13 <sup>c</sup> | 0.19 ± 0.09 <sup>c</sup> | 0.12 ± 0.09 <sup>c</sup>  | 0.28 ± 0.24 <sup>c</sup>  |
| Medium | nd  | 0.67 ± 0.4 <sup>b</sup>  | 0.82 ± 0.54 <sup>b</sup> | 1.01 ± 0.47 <sup>b</sup> | 0.75 ± 0.42 <sup>b</sup>  | 0.89 ± 0.56 <sup>b</sup>  |
| High   | nd  | 2.94 ± 1.85 <sup>a</sup> | 4.35 ± 1.45 <sup>a</sup> | 6.28 ± 2.18 <sup>a</sup> | 5.25 ± 1.35 <sup>a</sup>  | 5.1 ± 1.89 <sup>a</sup>   |
| BB     | nd  | 0.16 ± 0.09 <sup>c</sup> | 0.18 ± 0.14 <sup>c</sup> | 0.17 ± 0.11 <sup>c</sup> | 0.28 ± 0.21 <sup>bc</sup> | 0.39 ± 0.28 <sup>bc</sup> |
| NG     | nd  | nd                       | nd                       | nd                       | nd                        | nd                        |

Figure SI-3q – Myricetin.

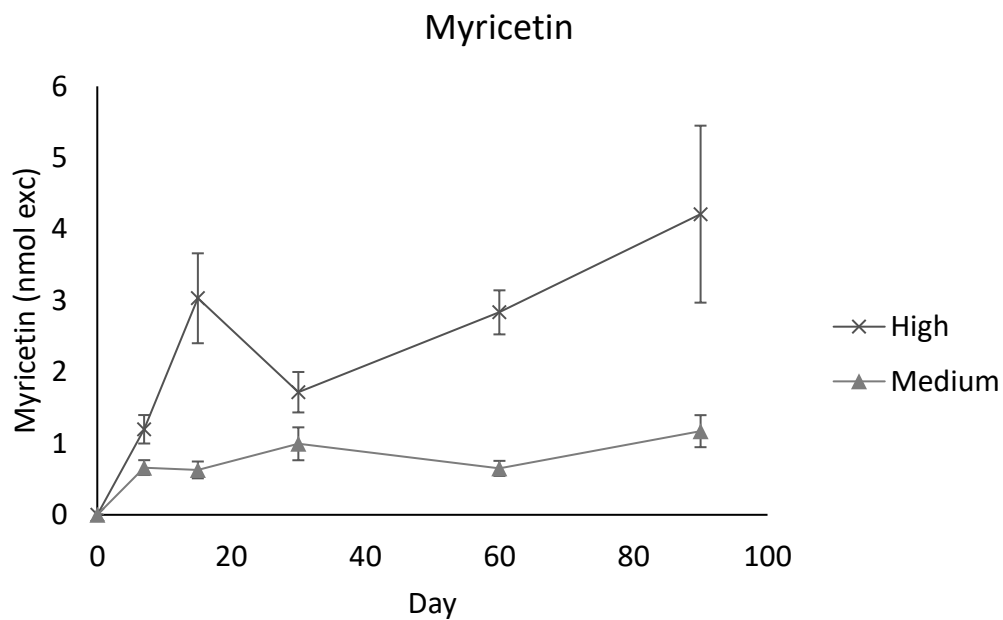

|        | Day |                          |                            |                             |                            |                            |       |
|--------|-----|--------------------------|----------------------------|-----------------------------|----------------------------|----------------------------|-------|
|        | 0   | 7                        | 15                         | 30                          | 60                         | 90                         |       |
| Water  | nd  | nd                       | nd                         | nd                          | nd                         | nd                         | nd    |
| Low    | nd  | trace                    | trace                      | trace                       | trace                      | trace                      | trace |
| Medium | nd  | 0.66 ± 0.31              | 0.63 ± 0.33 <sup>b</sup>   | 0.99 ± 0.69 <sup>b</sup>    | 0.65 ± 0.3 <sup>b</sup>    | 1.17 ± 0.63 <sup>b</sup>   |       |
| High   | nd  | 1.20 ± 0.60 <sup>B</sup> | 3.03 ± 1.89 <sup>a,A</sup> | 1.72 ± 0.85 <sup>a,AB</sup> | 2.84 ± 0.98 <sup>a,A</sup> | 4.21 ± 3.51 <sup>a,A</sup> |       |
| BB     | nd  | trace                    | trace                      | trace                       | trace                      | trace                      | trace |
| NG     | nd  | nd                       | nd                         | nd                          | nd                         | nd                         | nd    |



Figure SI-3r – Myricetin glucuronide.

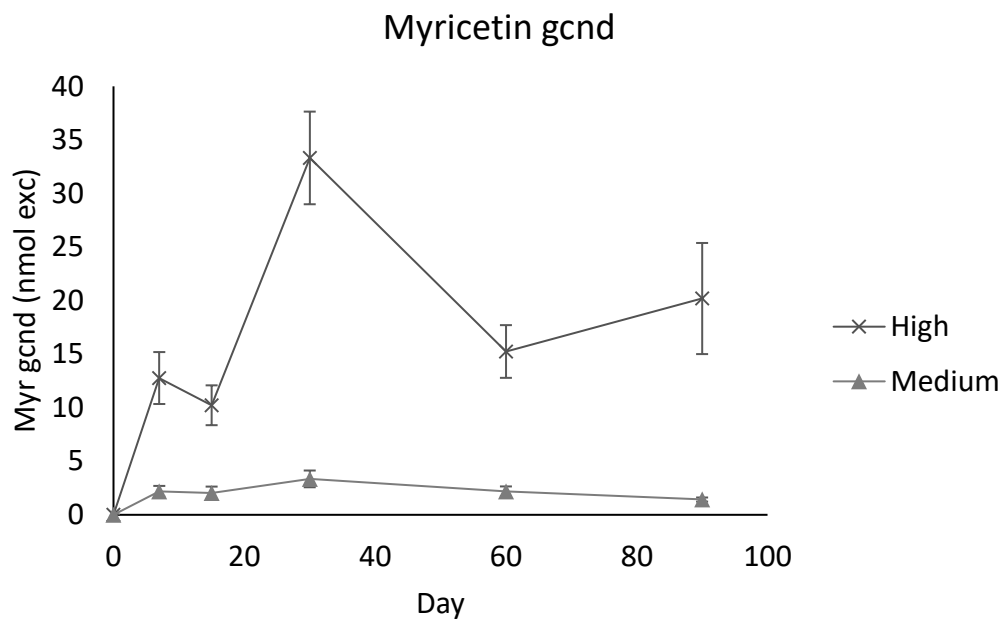

|        | Day |                             |                             |                              |                             |                               |    |
|--------|-----|-----------------------------|-----------------------------|------------------------------|-----------------------------|-------------------------------|----|
|        | 0   | 7                           | 15                          | 30                           | 60                          | 90                            |    |
| Water  | nd  | nd                          | nd                          | nd                           | nd                          | nd                            | nd |
| Low    | nd  | nd                          | nd                          | nd                           | nd                          | nd                            | nd |
| Medium | nd  | 2.20 ± 1.50 <sup>b</sup>    | 2.04 ± 1.68 <sup>b</sup>    | 3.35 ± 2.34 <sup>b</sup>     | 2.2 ± 1.27 <sup>b</sup>     | 1.43 ± 0.54 <sup>b</sup>      |    |
| High   | nd  | 12.77 ± 7.28 <sup>a,B</sup> | 10.23 ± 5.58 <sup>a,B</sup> | 33.32 ± 12.97 <sup>a,A</sup> | 15.25 ± 7.78 <sup>a,B</sup> | 20.19 ± 14.67 <sup>a,AB</sup> |    |
| BB     | nd  | nd                          | nd                          | nd                           | nd                          | nd                            | nd |
| NG     | nd  | nd                          | nd                          | nd                           | nd                          | nd                            | nd |

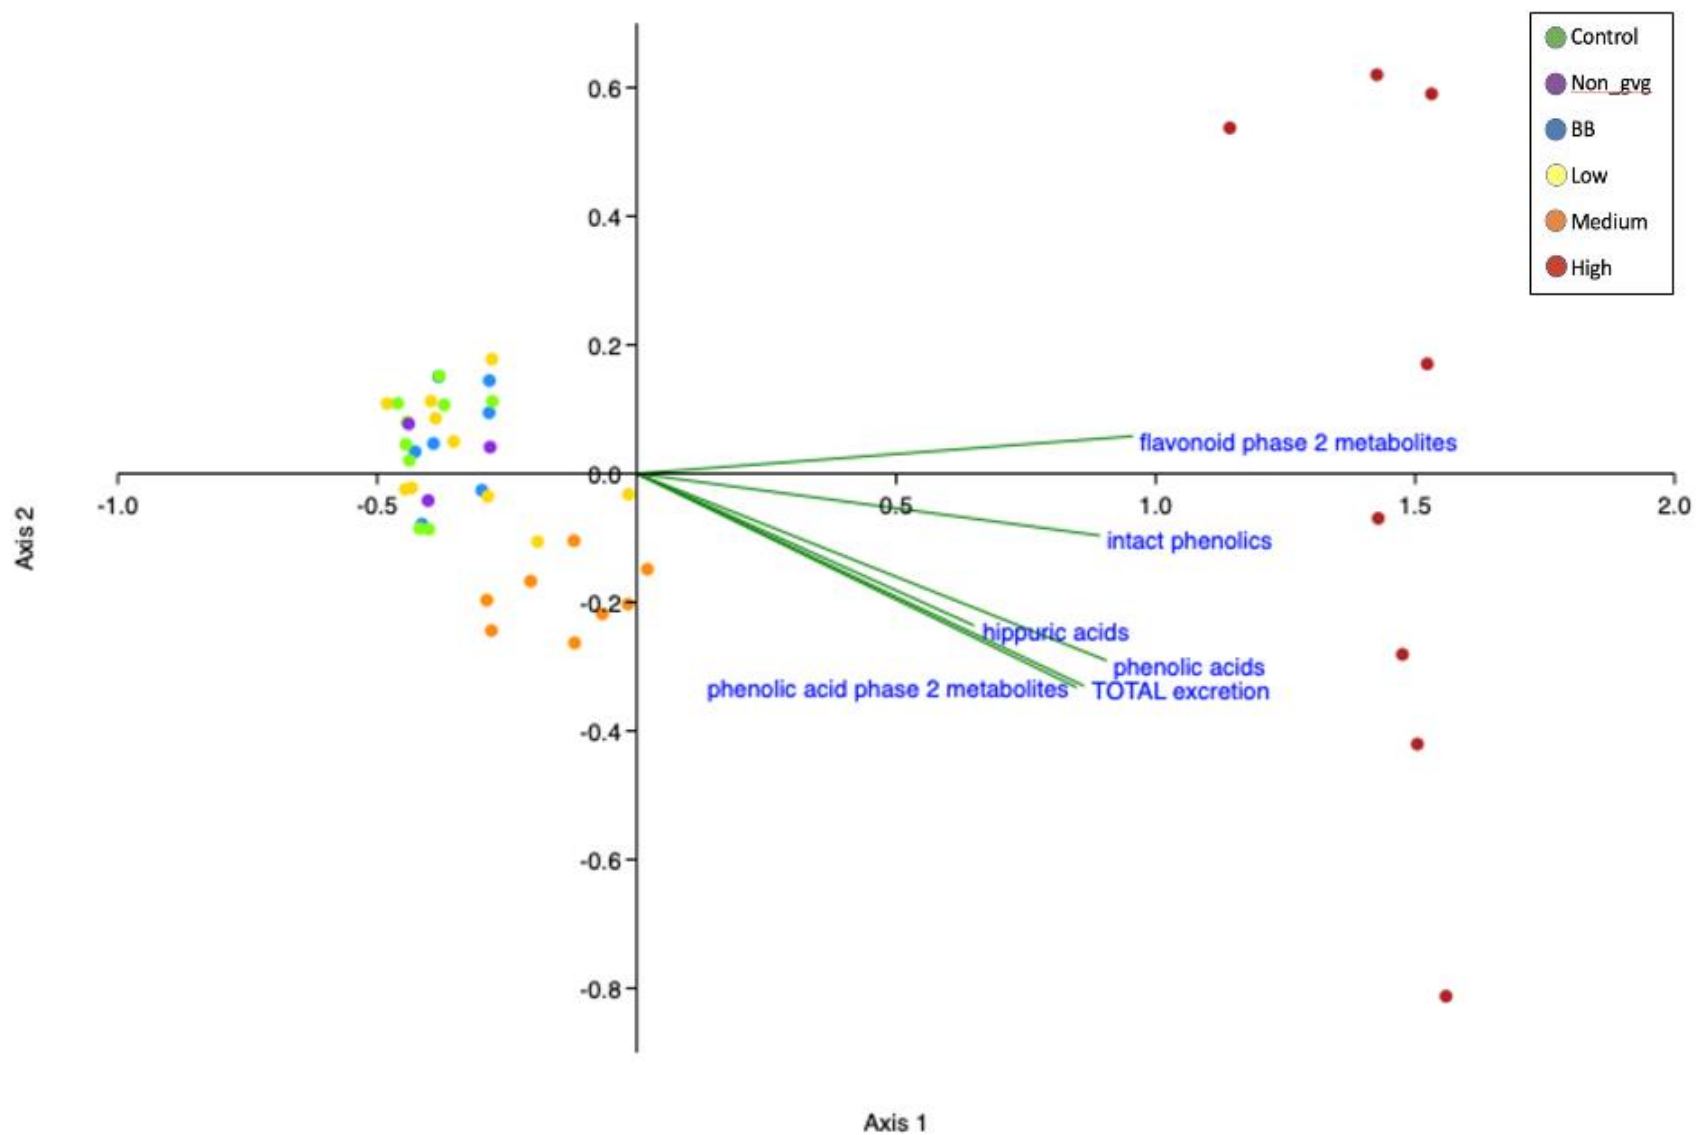

Supplement: d0fo03457f1.pdf [file d0fo03457f1.pdf]
